# Supplementary material for: Pentazolate coordination polymers self-assembled by in situ generated [Pb4(OH)4]4+ cubic cations trapping cyclo-N5−
Source: Royal Society of Chemistry journal article supplement (doi:10.1039/d1dt04392g), 2022-01-01
Supplement: d1dt04392g1.pdf [file d1dt04392g1.pdf]

## Electronic Supplementary Information

### **Pentazolate coordination polymers self-assembled by *in situ* generated $[\text{Pb}_4(\text{OH})_4]^{4+}$ cubic cations trapping *cyclo-N*<sub>5</sub><sup>-</sup>**

Yuan Yuan,<sup>‡a</sup> Yuangang Xu,<sup>‡\*a</sup> Qiang Xie,<sup>b</sup> Dongxue Li,<sup>c</sup> Qiuhan Lin,<sup>a</sup> Pengcheng  
Wang,<sup>a</sup> and Ming Lu<sup>\*a</sup>

<sup>a</sup> School of Chemistry and Chemical Engineering, Nanjing University of Science and  
Technology, Nanjing 210094, Jiangsu, China.

<sup>b</sup> School of Chemical Engineering, Anhui University of Science and Technology,  
Huainan 232001, Anhui, China

<sup>c</sup> China National Quality Supervision Testing Center for Industrial Explosive Materials,  
Xiaolingwei 200, Nanjing 210094, Jiangsu, China.

E-mail: [yuangangxu@163.com](mailto:yuangangxu@163.com); [luming@njust.edu.cn](mailto:luming@njust.edu.cn)

## Table of Contents

|                                                             |     |
|-------------------------------------------------------------|-----|
| 1. Single-crystal X-ray diffraction analysis of CP <b>1</b> | S3  |
| 2. Single-crystal X-ray diffraction analysis of CP <b>2</b> | S8  |
| 3. Single-crystal X-ray diffraction analysis of CP <b>3</b> | S13 |
| 4. Single-crystal X-ray diffraction analysis of CP <b>4</b> | S17 |
| 5. High-resolution mass spectra of CPs <b>1-4</b>           | S24 |
| 6. PXRD patterns of CPs <b>1-4</b>                          | S28 |
| 7. Non-isothermal kinetic analysis                          | S30 |
| 8. Computational details                                    | S34 |
| References                                                  | S35 |

# 1. Single-crystal X-ray diffraction analysis of CP 1

**Table S1.** Crystal data, data collection, and refinement for CP 1

|                                                     |                                                                           |
|-----------------------------------------------------|---------------------------------------------------------------------------|
| $\text{H}_4\text{N}_{20}\text{O}_4\text{Pb}_4$      | $F(000) = 1008$                                                           |
| $M_r = 1176.99$                                     | $D_x = 4.537 \text{ Mg m}^{-3}$                                           |
| Monoclinic, $P2_1$                                  | Mo $K\alpha$ radiation, $\lambda = 0.71073 \text{ \AA}$                   |
| $a = 7.6556 (10) \text{ \AA}$                       | Cell parameters from 6056 reflections                                     |
| $b = 13.6507 (17) \text{ \AA}$                      | $\theta = 2.5\text{--}30.2^\circ$                                         |
| $c = 8.5962 (11) \text{ \AA}$                       | $\mu = 39.03 \text{ mm}^{-1}$                                             |
| $\beta = 106.440 (4)^\circ$                         | $T = 296 \text{ K}$                                                       |
| $V = 861.61 (19) \text{ \AA}^3$                     | Block, colourless                                                         |
| $Z = 2$                                             | $0.03 \times 0.03 \times 0.03 \text{ mm}$                                 |
| Bruker D8 QUEST PHOTON 100 diffractometer           | 2850 reflections with $I > 2\sigma(I)$                                    |
| Detector resolution: $10.42 \text{ pixels mm}^{-1}$ | $R_{\text{int}} = 0.043$                                                  |
| $\phi$ and $\omega$ scans                           | $\theta_{\text{max}} = 25.0^\circ$ , $\theta_{\text{min}} = 2.5^\circ$    |
| Absorption correction: multi-scan <i>SADABS</i>     | $h = -9 \rightarrow 9$                                                    |
| $T_{\text{min}} = 0.407$ , $T_{\text{max}} = 0.746$ | $k = -16 \rightarrow 16$                                                  |
| 9072 measured reflections                           | $l = -10 \rightarrow 10$                                                  |
| 3013 independent reflections                        |                                                                           |
| Refinement on $F^2$                                 | Hydrogen site location: difference Fourier map                            |
| Least-squares matrix: full                          | H-atom parameters constrained                                             |
| $R[F^2 > 2\sigma(F^2)] = 0.030$                     | $w = 1/[\sigma^2(F_o^2) + (0.0354P)^2]$<br>where $P = (F_o^2 + 2F_c^2)/3$ |
| $wR(F^2) = 0.067$                                   | $(\Delta/\sigma)_{\text{max}} = 0.001$                                    |
| $S = 1.01$                                          | $\Delta_{\text{max}} = 2.52 \text{ e \AA}^{-3}$                           |
| 3013 reflections                                    | $\Delta_{\text{min}} = -1.13 \text{ e \AA}^{-3}$                          |
| 254 parameters                                      | Absolute structure: Refined as an inversion twin.                         |
| 41 restraints                                       | Absolute structure parameter: 0.03 (3)                                    |

**Table S2.** Fractional atomic coordinates and isotropic or equivalent isotropic displacement parameters ( $\text{\AA}^2$ ) for **1**

|     | $x$          | $y$         | $z$          | $U_{\text{iso}}^*/U_{\text{eq}}$ |
|-----|--------------|-------------|--------------|----------------------------------|
| Pb1 | 0.78330 (12) | 0.62502 (6) | 0.50629 (9)  | 0.0244 (2)                       |
| Pb2 | 0.94024 (12) | 0.40915 (5) | 0.80611 (9)  | 0.0251 (2)                       |
| Pb3 | 0.56478 (11) | 0.57787 (6) | 0.84131 (10) | 0.0261 (2)                       |
| Pb4 | 1.04856 (12) | 0.66947 (6) | 0.95281 (9)  | 0.0262 (2)                       |
| O1  | 0.684 (2)    | 0.4953 (10) | 0.6447 (16)  | 0.024 (3)                        |

|     |             |             |             |            |
|-----|-------------|-------------|-------------|------------|
| H1  | 0.600254    | 0.455301    | 0.597380    | 0.036*     |
| O2  | 0.756 (2)   | 0.6877 (10) | 0.7621 (16) | 0.023 (3)  |
| H2  | 0.740310    | 0.742912    | 0.714063    | 0.035*     |
| O3  | 0.8636 (18) | 0.5376 (10) | 0.9777 (15) | 0.020 (3)  |
| H3  | 0.831273    | 0.499596    | 1.042238    | 0.030*     |
| O4  | 1.0392 (18) | 0.5639 (10) | 0.7341 (16) | 0.021 (3)  |
| H4  | 1.097944    | 0.550980    | 0.667212    | 0.031*     |
| N1  | 0.958 (3)   | 0.3791 (13) | 0.499 (2)   | 0.028 (4)  |
| N2  | 0.898 (3)   | 0.4515 (13) | 0.404 (2)   | 0.027 (4)  |
| N3  | 0.891 (3)   | 0.4232 (14) | 0.258 (2)   | 0.032 (5)  |
| N4  | 0.941 (3)   | 0.3295 (15) | 0.264 (2)   | 0.036 (5)  |
| N5  | 0.991 (3)   | 0.3050 (14) | 0.416 (2)   | 0.032 (5)  |
| N6  | 0.461 (3)   | 0.4410 (17) | 0.320 (3)   | 0.046 (6)  |
| N7  | 0.335 (3)   | 0.3884 (13) | 0.220 (2)   | 0.032 (5)  |
| N8  | 0.253 (3)   | 0.4425 (16) | 0.097 (2)   | 0.039 (5)  |
| N9  | 0.335 (3)   | 0.5260 (15) | 0.121 (3)   | 0.045 (6)  |
| N10 | 0.459 (3)   | 0.5257 (15) | 0.253 (2)   | 0.037 (5)  |
| N11 | 0.403 (5)   | 0.366 (2)   | 0.802 (3)   | 0.069 (8)  |
| N12 | 0.560 (5)   | 0.352 (2)   | 0.898 (4)   | 0.073 (9)  |
| N13 | 0.565 (3)   | 0.2685 (19) | 0.975 (3)   | 0.054 (7)  |
| N14 | 0.397 (4)   | 0.2361 (17) | 0.927 (3)   | 0.056 (7)  |
| N15 | 0.295 (3)   | 0.294 (3)   | 0.823 (3)   | 0.076 (10) |
| N16 | 0.389 (4)   | 0.724 (2)   | 0.444 (4)   | 0.069 (5)  |
| N17 | 0.374 (4)   | 0.656 (2)   | 0.546 (3)   | 0.066 (5)  |
| N18 | 0.216 (4)   | 0.614 (2)   | 0.488 (3)   | 0.067 (5)  |
| N19 | 0.131 (4)   | 0.660 (2)   | 0.349 (3)   | 0.076 (6)  |
| N20 | 0.245 (5)   | 0.725 (2)   | 0.328 (3)   | 0.071 (5)  |

**Table S3.** Atomic displacement parameters ( $\text{\AA}^2$ ) for **1**

|     | $U^{11}$   | $U^{22}$   | $U^{33}$   | $U^{12}$    | $U^{13}$   | $U^{23}$    |
|-----|------------|------------|------------|-------------|------------|-------------|
| Pb1 | 0.0390 (5) | 0.0187 (4) | 0.0147 (4) | -0.0016 (4) | 0.0064 (3) | 0.0027 (3)  |
| Pb2 | 0.0422 (5) | 0.0130 (4) | 0.0177 (4) | 0.0040 (4)  | 0.0047 (4) | 0.0013 (3)  |
| Pb3 | 0.0299 (5) | 0.0265 (4) | 0.0255 (4) | 0.0009 (4)  | 0.0136 (4) | 0.0028 (4)  |
| Pb4 | 0.0400 (5) | 0.0170 (4) | 0.0171 (4) | -0.0051 (4) | 0.0011 (4) | -0.0026 (3) |
| O1  | 0.030 (9)  | 0.019 (8)  | 0.018 (8)  | 0.000 (7)   | -0.002 (6) | -0.004 (6)  |
| O2  | 0.045 (9)  | 0.010 (7)  | 0.013 (7)  | -0.002 (7)  | 0.005 (6)  | -0.002 (6)  |
| O3  | 0.033 (8)  | 0.019 (7)  | 0.008 (6)  | -0.006 (7)  | 0.005 (6)  | -0.001 (6)  |
| O4  | 0.025 (7)  | 0.020 (7)  | 0.021 (7)  | 0.005 (6)   | 0.012 (6)  | 0.003 (6)   |

|     |            |            |            |             |             |             |
|-----|------------|------------|------------|-------------|-------------|-------------|
| N1  | 0.039 (12) | 0.018 (9)  | 0.027 (10) | 0.011 (9)   | 0.013 (9)   | 0.006 (8)   |
| N2  | 0.049 (12) | 0.020 (9)  | 0.011 (8)  | 0.005 (9)   | 0.006 (8)   | -0.007 (8)  |
| N3  | 0.047 (13) | 0.025 (11) | 0.021 (10) | 0.001 (9)   | 0.004 (9)   | 0.006 (8)   |
| N4  | 0.054 (14) | 0.032 (11) | 0.027 (11) | 0.018 (10)  | 0.019 (10)  | -0.008 (9)  |
| N5  | 0.050 (13) | 0.022 (10) | 0.023 (10) | 0.013 (10)  | 0.008 (9)   | 0.002 (8)   |
| N6  | 0.045 (14) | 0.048 (14) | 0.032 (12) | -0.011 (11) | -0.009 (10) | -0.007 (11) |
| N7  | 0.028 (10) | 0.017 (10) | 0.047 (13) | -0.001 (8)  | 0.005 (10)  | -0.004 (9)  |
| N8  | 0.042 (13) | 0.046 (13) | 0.020 (10) | 0.010 (11)  | -0.005 (9)  | -0.005 (10) |
| N9  | 0.063 (15) | 0.024 (11) | 0.048 (15) | 0.000 (12)  | 0.013 (13)  | 0.007 (10)  |
| N10 | 0.045 (12) | 0.034 (12) | 0.029 (11) | -0.023 (11) | 0.006 (10)  | 0.000 (9)   |
| N11 | 0.10 (2)   | 0.056 (17) | 0.047 (17) | 0.017 (18)  | 0.010 (17)  | 0.007 (14)  |
| N12 | 0.11 (3)   | 0.058 (19) | 0.063 (19) | -0.041 (19) | 0.038 (19)  | -0.018 (16) |
| N13 | 0.036 (14) | 0.059 (17) | 0.053 (15) | 0.012 (13)  | -0.008 (11) | 0.008 (13)  |
| N14 | 0.09 (2)   | 0.037 (14) | 0.054 (16) | -0.005 (14) | 0.034 (16)  | 0.008 (12)  |
| N15 | 0.031 (14) | 0.14 (3)   | 0.056 (18) | -0.012 (19) | 0.006 (13)  | -0.04 (2)   |
| N16 | 0.080 (12) | 0.065 (11) | 0.069 (11) | 0.001 (10)  | 0.032 (10)  | -0.003 (10) |
| N17 | 0.076 (11) | 0.064 (12) | 0.060 (11) | 0.010 (10)  | 0.022 (9)   | -0.004 (9)  |
| N18 | 0.080 (12) | 0.071 (12) | 0.065 (11) | 0.001 (10)  | 0.042 (10)  | -0.009 (9)  |
| N19 | 0.073 (12) | 0.076 (12) | 0.073 (11) | 0.014 (10)  | 0.012 (10)  | -0.019 (10) |
| N20 | 0.095 (13) | 0.062 (12) | 0.057 (11) | 0.021 (10)  | 0.024 (10)  | 0.000 (9)   |

**Table S4.** Geometric parameters (Å, °) for **1**

|         |            |         |          |
|---------|------------|---------|----------|
| Pb1—O1  | 2.377 (15) | N1—N5   | 1.30 (2) |
| Pb1—O2  | 2.422 (13) | N2—N3   | 1.30 (2) |
| Pb1—O4  | 2.489 (13) | N3—N4   | 1.33 (3) |
| Pb1—N2  | 2.759 (17) | N4—N5   | 1.30 (3) |
| Pb2—O1  | 2.372 (14) | N6—N10  | 1.29 (3) |
| Pb2—O4  | 2.384 (14) | N6—N7   | 1.31 (3) |
| Pb2—O3  | 2.466 (13) | N7—N8   | 1.30 (3) |
| Pb2—N1  | 2.715 (19) | N8—N9   | 1.29 (3) |
| Pb3—O3  | 2.322 (13) | N9—N10  | 1.26 (3) |
| Pb3—O2  | 2.331 (14) | N11—N12 | 1.26 (4) |
| Pb3—O1  | 2.414 (14) | N11—N15 | 1.33 (4) |
| Pb3—N17 | 2.76 (3)   | N12—N13 | 1.31 (4) |
| Pb4—O3  | 2.338 (14) | N13—N14 | 1.31 (4) |
| Pb4—O4  | 2.354 (14) | N14—N15 | 1.28 (4) |
| Pb4—O2  | 2.382 (14) | N16—N20 | 1.25 (4) |
| O1—H1   | 0.8506     | N16—N17 | 1.31 (4) |

|            |           |             |            |
|------------|-----------|-------------|------------|
| O2—H2      | 0.8509    | N17—N18     | 1.30 (4)   |
| O3—H3      | 0.8456    | N18—N19     | 1.34 (4)   |
| O4—H4      | 0.8425    | N19—N20     | 1.29 (4)   |
| N1—N2      | 1.28 (2)  |             |            |
|            |           |             |            |
| O1—Pb1—O2  | 71.8 (5)  | Pb3—O3—H3   | 92.7       |
| O1—Pb1—O4  | 69.5 (5)  | Pb4—O3—H3   | 146.0      |
| O2—Pb1—O4  | 69.8 (5)  | Pb2—O3—H3   | 96.9       |
| O1—Pb1—N2  | 72.4 (5)  | Pb4—O4—Pb2  | 106.0 (5)  |
| O2—Pb1—N2  | 135.3 (5) | Pb4—O4—Pb1  | 105.2 (5)  |
| O4—Pb1—N2  | 73.3 (5)  | Pb2—O4—Pb1  | 105.3 (5)  |
| O1—Pb2—O4  | 71.4 (5)  | Pb4—O4—H4   | 140.5      |
| O1—Pb2—O3  | 72.5 (5)  | Pb2—O4—H4   | 105.2      |
| O4—Pb2—O3  | 70.9 (5)  | Pb1—O4—H4   | 89.2       |
| O1—Pb2—N1  | 76.5 (5)  | N2—N1—N5    | 110.0 (17) |
| O4—Pb2—N1  | 77.0 (5)  | N2—N1—Pb2   | 113.5 (13) |
| O3—Pb2—N1  | 140.8 (5) | N5—N1—Pb2   | 135.9 (14) |
| O3—Pb3—O2  | 71.8 (5)  | N1—N2—N3    | 107.4 (17) |
| O3—Pb3—O1  | 74.4 (5)  | N1—N2—Pb1   | 123.1 (13) |
| O2—Pb3—O1  | 72.7 (5)  | N3—N2—Pb1   | 129.3 (13) |
| O3—Pb3—N17 | 138.2 (7) | N2—N3—N4    | 108.2 (17) |
| O2—Pb3—N17 | 72.3 (7)  | N5—N4—N3    | 106.7 (18) |
| O1—Pb3—N17 | 75.0 (6)  | N4—N5—N1    | 107.4 (18) |
| O3—Pb4—O4  | 73.7 (5)  | N10—N6—N7   | 106.5 (19) |
| O3—Pb4—O2  | 70.7 (5)  | N8—N7—N6    | 108.6 (19) |
| O4—Pb4—O2  | 72.8 (5)  | N9—N8—N7    | 105.7 (18) |
| Pb2—O1—Pb1 | 109.4 (6) | N10—N9—N8   | 111 (2)    |
| Pb2—O1—Pb3 | 103.6 (5) | N9—N10—N6   | 108.5 (19) |
| Pb1—O1—Pb3 | 103.9 (5) | N12—N11—N15 | 108 (3)    |
| Pb2—O1—H1  | 110.3     | N11—N12—N13 | 110 (3)    |
| Pb1—O1—H1  | 122.9     | N14—N13—N12 | 105 (2)    |
| Pb3—O1—H1  | 104.7     | N15—N14—N13 | 111 (3)    |
| Pb3—O2—Pb4 | 106.1 (5) | N14—N15—N11 | 105 (2)    |
| Pb3—O2—Pb1 | 105.1 (5) | N20—N16—N17 | 108 (3)    |
| Pb4—O2—Pb1 | 106.5 (6) | N18—N17—N16 | 108 (3)    |
| Pb3—O2—H2  | 133.9     | N18—N17—Pb3 | 112 (2)    |
| Pb4—O2—H2  | 114.0     | N16—N17—Pb3 | 140 (2)    |
| Pb1—O2—H2  | 84.9      | N17—N18—N19 | 108 (3)    |
| Pb3—O3—Pb4 | 107.9 (5) | N20—N19—N18 | 105 (3)    |

|            |           |             |         |
|------------|-----------|-------------|---------|
| Pb3—O3—Pb2 | 103.5 (5) | N16—N20—N19 | 111 (3) |
| Pb4—O3—Pb2 | 103.9 (5) |             |         |

**Table S5.** Hydrogen bonds (Å, °) for **1**

| $D-H\cdots A$                    | $D-H$ | $H\cdots A$ | $D\cdots A$ | $D-H\cdots A$ |
|----------------------------------|-------|-------------|-------------|---------------|
| O1—H1 $\cdots$ N6                | 0.85  | 2.33        | 2.92 (2)    | 127           |
| O2—H2 $\cdots$ N4 <sup>i</sup>   | 0.85  | 2.67        | 3.08 (2)    | 111           |
| O2—H2 $\cdots$ N7 <sup>ii</sup>  | 0.85  | 2.18        | 2.84 (2)    | 134           |
| O3—H3 $\cdots$ N3 <sup>iii</sup> | 0.85  | 2.06        | 2.83 (2)    | 150           |
| O4—H4 $\cdots$ N18 <sup>iv</sup> | 0.84  | 2.17        | 2.90 (3)    | 144           |

Symmetry codes: (i)  $-x+2, y+1/2, -z+1$ ; (ii)  $-x+1, y+1/2, -z+1$ ; (iii)  $x, y, z+1$ ; (iv)  $x+1, y, z$ .

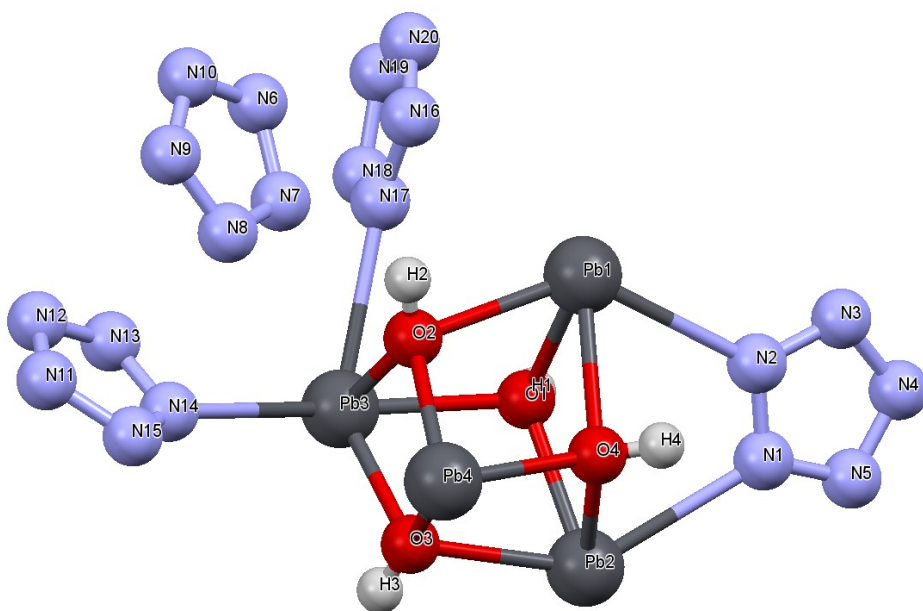

**Fig. S1** The asymmetric unit in CP **1**.

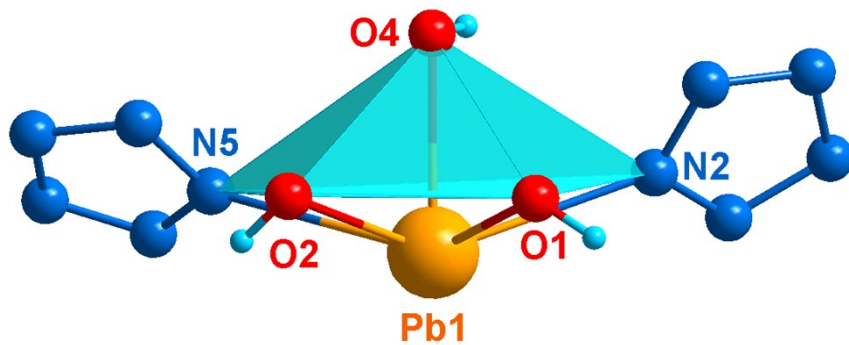

**Fig. S2** Coordination environment of the Pb1<sup>2+</sup> ion in CP **1**.

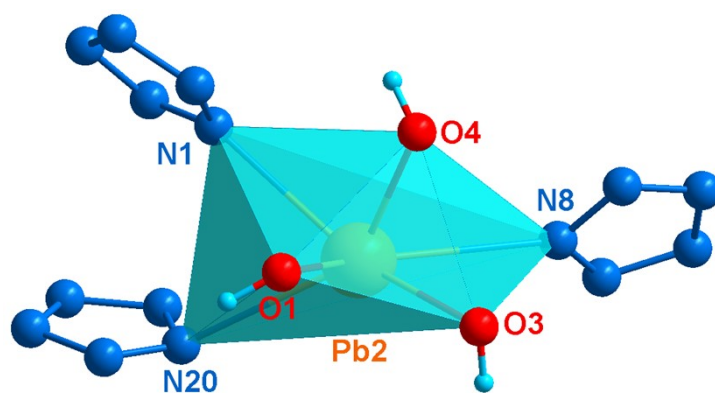

**Fig. S3** Coordination environment of the  $\text{Pb}^{2+}$  ion in CP 1.

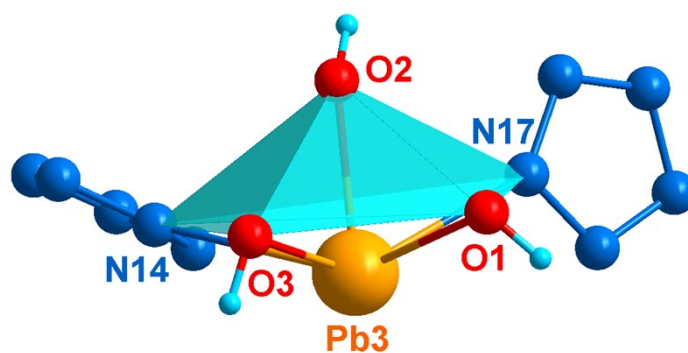

**Fig. S4** Coordination environment of the  $\text{Pb}^{3+}$  ion in CP 1.

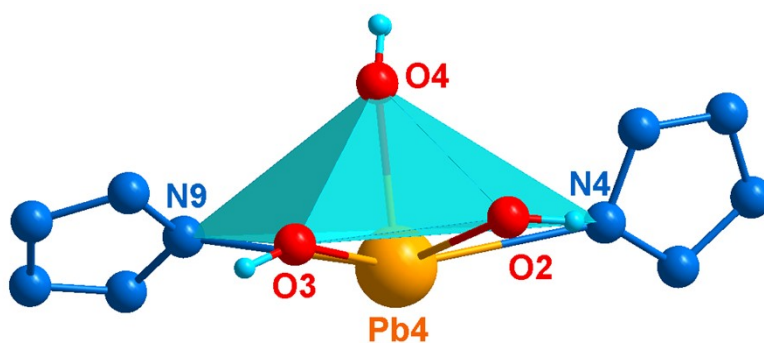

**Fig. S5** Coordination environment of the  $\text{Pb}^{4+}$  ion in CP 1.

## 2. Single-crystal X-ray diffraction analysis of CP 2

**Table S6.** Crystal data, data collection, and refinement for CP 2

|                                                                                                                                                        |                                                         |
|--------------------------------------------------------------------------------------------------------------------------------------------------------|---------------------------------------------------------|
| $2(\text{H}_{18}\text{N}_{16}\text{O}_{12}\text{Pb}_3) \cdot 4(\text{N}_5) \cdot \text{H}_3\text{O}_{1.50} \cdot 2(\text{O}_{0.50}) \cdot 2(\text{H})$ | $D_x = 2.852 \text{ Mg m}^{-3}$                         |
| $M_r = 2436.99$                                                                                                                                        | Mo $K\alpha$ radiation, $\lambda = 0.71073 \text{ \AA}$ |
| Hexagonal, $P6_3/m$                                                                                                                                    | Cell parameters from 7396 reflections                   |
| $a = 14.9624 (5) \text{ \AA}$                                                                                                                          | $\theta = 2.7\text{--}27.5^\circ$                       |



|                                                     |                                                                                    |
|-----------------------------------------------------|------------------------------------------------------------------------------------|
| $c = 7.3194 (2) \text{ \AA}$                        | $\mu = 17.85 \text{ mm}^{-1}$                                                      |
| $V = 1419.09 (10) \text{ \AA}^3$                    | $T = 296 \text{ K}$                                                                |
| $Z = 1$                                             | Needle, colourless                                                                 |
| $F(000) = 1109$                                     | $0.20 \times 0.01 \times 0.01 \text{ mm}$                                          |
| Bruker D8 QUEST PHOTON 100 diffractometer           | 1039 reflections with $I > 2\sigma(I)$                                             |
| Detector resolution: $10.42 \text{ pixels mm}^{-1}$ | $R_{\text{int}} = 0.037$                                                           |
| $\phi$ and $\omega$ scans                           | $\theta_{\text{max}} = 27.5^\circ, \theta_{\text{min}} = 3.1^\circ$                |
| Absorption correction: multi-scan <i>SADABS</i>     | $h = -16 \rightarrow 19$                                                           |
| $T_{\text{min}} = 0.368, T_{\text{max}} = 0.746$    | $k = -19 \rightarrow 19$                                                           |
| 14760 measured reflections                          | $l = -9 \rightarrow 9$                                                             |
| 1172 independent reflections                        |                                                                                    |
| Refinement on $F^2$                                 | 0 restraints                                                                       |
| Least-squares matrix: full                          | Hydrogen site location: difference Fourier map                                     |
| $R[F^2 > 2\sigma(F^2)] = 0.021$                     | H-atom parameters constrained                                                      |
| $wR(F^2) = 0.041$                                   | $w = 1/[\sigma^2(F_o^2) + (0.016P)^2 + 3.8176P]$<br>where $P = (F_o^2 + 2F_c^2)/3$ |
| $S = 1.05$                                          | $(\Delta/\sigma)_{\text{max}} = 0.001$                                             |
| 1172 reflections                                    | $\Delta_{\text{max}} = 1.77 \text{ e \AA}^{-3}$                                    |
| 86 parameters                                       | $\Delta_{\text{min}} = -1.05 \text{ e \AA}^{-3}$                                   |

**Table S7.** Fractional atomic coordinates and isotropic or equivalent isotropic displacement parameters ( $\text{\AA}^2$ ) for **2**

|     | $x$          | $y$         | $z$         | $U_{\text{iso}}^*/U_{\text{eq}}$ | Occ. (<1) |
|-----|--------------|-------------|-------------|----------------------------------|-----------|
| Pb1 | 0.49955 (2)  | 0.58062 (2) | 0.250000    | 0.02420 (8)                      |           |
| N1  | 0.5042 (2)   | 0.3426 (2)  | 0.3957 (4)  | 0.0227 (6)                       |           |
| N2  | 0.4943 (3)   | 0.2542 (2)  | 0.3403 (4)  | 0.0272 (7)                       |           |
| N3  | 0.5106 (3)   | 0.3963 (3)  | 0.250000    | 0.0196 (9)                       |           |
| N4  | 0.333333     | 0.666667    | 0.250000    | 0.0219 (16)                      |           |
| O3  | 0.3066 (3)   | 0.5729 (3)  | 0.250000    | 0.0326 (9)                       |           |
| O1  | 0.6646 (4)   | 0.7653 (4)  | 0.250000    | 0.0607 (14)                      |           |
| H1A | 0.646631     | 0.810998    | 0.250000    | 0.091*                           |           |
| H1B | 0.696981     | 0.774728    | 0.149970    | 0.091*                           | 0.5       |
| O2  | 0.37214 (19) | 0.4332 (2)  | 0.0053 (4)  | 0.0276 (6)                       |           |
| H2A | 0.324731     | 0.376466    | 0.071517    | 0.041*                           |           |
| H2B | 0.328741     | 0.449936    | -0.044883   | 0.041*                           |           |
| N5  | 0.1397 (9)   | 0.2239 (10) | 0.750000    | 0.073 (3)                        | 0.6667    |
| N6  | 0.0239 (5)   | 0.2581 (6)  | 0.6640 (11) | 0.0547 (18)                      | 0.6667    |

|     |              |             |             |            |        |
|-----|--------------|-------------|-------------|------------|--------|
| N7  | 0.0988 (7)   | 0.2400 (7)  | 0.6077 (12) | 0.082 (3)  | 0.6667 |
| O4  | -0.0212 (18) | 0.2581 (16) | 0.750000    | 0.048 (5)  | 0.25   |
| H4  | -0.034378    | 0.224183    | 0.849080    | 0.072*     | 0.25   |
| O5  | 1.000000     | 1.000000    | 0.500000    | 0.126 (12) | 0.5    |
| H5A | 1.036790     | 0.973530    | 0.528920    | 0.188*     | 0.0833 |
| H5B | 0.938230     | 0.950990    | 0.512490    | 0.188*     | 0.0833 |

**Table S8.** Atomic displacement parameters ( $\text{\AA}^2$ ) for **2**

|     | $U^{11}$     | $U^{22}$     | $U^{33}$     | $U^{12}$    | $U^{13}$     | $U^{23}$    |
|-----|--------------|--------------|--------------|-------------|--------------|-------------|
| Pb1 | 0.02827 (12) | 0.02611 (12) | 0.02014 (11) | 0.01503 (9) | 0.000        | 0.000       |
| N1  | 0.0332 (17)  | 0.0234 (15)  | 0.0171 (15)  | 0.0184 (14) | 0.0003 (14)  | 0.0008 (13) |
| N2  | 0.0444 (19)  | 0.0235 (16)  | 0.0195 (15)  | 0.0212 (15) | 0.0008 (15)  | 0.0015 (14) |
| N3  | 0.026 (2)    | 0.019 (2)    | 0.016 (2)    | 0.0131 (19) | 0.000        | 0.000       |
| N4  | 0.025 (2)    | 0.025 (2)    | 0.016 (4)    | 0.0124 (12) | 0.000        | 0.000       |
| O3  | 0.039 (2)    | 0.022 (2)    | 0.038 (2)    | 0.0159 (18) | 0.000        | 0.000       |
| O1  | 0.063 (3)    | 0.038 (3)    | 0.070 (4)    | 0.017 (3)   | 0.000        | 0.000       |
| O2  | 0.0249 (13)  | 0.0299 (13)  | 0.0324 (15)  | 0.0170 (11) | -0.0004 (13) | 0.0061 (12) |
| N5  | 0.071 (7)    | 0.108 (9)    | 0.077 (8)    | 0.073 (8)   | 0.000        | 0.000       |
| N6  | 0.056 (5)    | 0.067 (5)    | 0.057 (4)    | 0.041 (4)   | -0.003 (4)   | 0.005 (4)   |
| N7  | 0.093 (6)    | 0.123 (7)    | 0.050 (5)    | 0.069 (6)   | 0.012 (4)    | 0.004 (5)   |
| O4  | 0.057 (15)   | 0.035 (11)   | 0.062 (16)   | 0.030 (12)  | 0.000        | 0.000       |
| O5  | 0.060 (8)    | 0.060 (8)    | 0.26 (4)     | 0.030 (4)   | 0.000        | 0.000       |

**Table S9.** Geometric parameters ( $\text{\AA}$ ,  $^\circ$ ) for **2**

|                      |           |                        |            |
|----------------------|-----------|------------------------|------------|
| Pb1—O1               | 2.629 (5) | N6—N7                  | 1.344 (10) |
| Pb1—O2 <sup>i</sup>  | 2.739 (3) | N6—H4 <sup>iv</sup>    | 0.76 (2)   |
| Pb1—O2               | 2.739 (3) | O4—H4                  | 0.8500     |
| N1—N3                | 1.310 (4) | O4—H4 <sup>iv</sup>    | 0.8501     |
| N1—N2                | 1.319 (4) | O5—H5A                 | 0.8501     |
| N2—N2 <sup>i</sup>   | 1.322 (6) | O5—H5B                 | 0.8500     |
| N4—O3 <sup>ii</sup>  | 1.252 (4) | O5—H5A <sup>v</sup>    | 0.8502     |
| N4—O3 <sup>iii</sup> | 1.252 (4) | O5—H5A <sup>vi</sup>   | 0.8502     |
| N4—O3                | 1.252 (4) | O5—H5A <sup>vii</sup>  | 0.8502     |
| O1—H1A               | 0.8500    | O5—H5A <sup>viii</sup> | 0.8502     |
| O1—H1B               | 0.8500    | O5—H5A <sup>ix</sup>   | 0.8502     |
| O1—H1B <sup>i</sup>  | 0.8501    | O5—H5B <sup>v</sup>    | 0.8500     |
| O2—H2A               | 0.9254    | O5—H5B <sup>vi</sup>   | 0.8500     |
| O2—H2B               | 0.8843    | O5—H5B <sup>vii</sup>  | 0.8500     |

|                                          |             |                                             |        |
|------------------------------------------|-------------|---------------------------------------------|--------|
| N5—N7                                    | 1.290 (10)  | O5—H5B <sup>viii</sup>                      | 0.8500 |
| N5—N7 <sup>iv</sup>                      | 1.290 (10)  | O5—H5B <sup>ix</sup>                        | 0.8500 |
| N6—N6 <sup>iv</sup>                      | 1.258 (15)  |                                             |        |
|                                          |             |                                             |        |
| O1—Pb1—O2 <sup>i</sup>                   | 139.14 (6)  | H5B—O5—H5B <sup>v</sup>                     | 180.0  |
| O1—Pb1—O2                                | 139.14 (6)  | H5A <sup>v</sup> —O5—H5B <sup>v</sup>       | 104.4  |
| O2 <sup>i</sup> —Pb1—O2                  | 81.66 (11)  | H5A <sup>vi</sup> —O5—H5B <sup>v</sup>      | 50.6   |
| N3—N1—N2                                 | 107.6 (3)   | H5A <sup>vii</sup> —O5—H5B <sup>v</sup>     | 129.4  |
| N1—N2—N2 <sup>i</sup>                    | 107.91 (19) | H5A <sup>viii</sup> —O5—H5B <sup>v</sup>    | 164.5  |
| N1 <sup>i</sup> —N3—N1                   | 109.0 (4)   | H5A <sup>ix</sup> —O5—H5B <sup>v</sup>      | 15.5   |
| O3 <sup>ii</sup> —N4—O3 <sup>iii</sup>   | 119.996 (1) | H5A—O5—H5B <sup>vi</sup>                    | 15.5   |
| O3 <sup>ii</sup> —N4—O3                  | 120.001 (1) | H5B—O5—H5B <sup>vi</sup>                    | 118.9  |
| O3 <sup>iii</sup> —N4—O3                 | 120.003 (1) | H5A <sup>v</sup> —O5—H5B <sup>vi</sup>      | 164.5  |
| Pb1—O1—H1A                               | 109.7       | H5A <sup>vi</sup> —O5—H5B <sup>vi</sup>     | 104.4  |
| Pb1—O1—H1B                               | 109.4       | H5A <sup>vii</sup> —O5—H5B <sup>vi</sup>    | 75.6   |
| H1A—O1—H1B                               | 104.5       | H5A <sup>viii</sup> —O5—H5B <sup>vi</sup>   | 129.4  |
| Pb1—O1—H1B <sup>i</sup>                  | 109.39 (5)  | H5A <sup>ix</sup> —O5—H5B <sup>vi</sup>     | 50.6   |
| H1A—O1—H1B <sup>i</sup>                  | 104.5       | H5B <sup>v</sup> —O5—H5B <sup>vi</sup>      | 61.1   |
| H1B—O1—H1B <sup>i</sup>                  | 118.9       | H5A—O5—H5B <sup>vii</sup>                   | 164.5  |
| Pb1—O2—H2A                               | 107.6       | H5B—O5—H5B <sup>vii</sup>                   | 61.1   |
| Pb1—O2—H2B                               | 111.0       | H5A <sup>v</sup> —O5—H5B <sup>vii</sup>     | 15.5   |
| H2A—O2—H2B                               | 98.2        | H5A <sup>vi</sup> —O5—H5B <sup>vii</sup>    | 75.6   |
| N7—N5—N7 <sup>iv</sup>                   | 107.7 (10)  | H5A <sup>vii</sup> —O5—H5B <sup>vii</sup>   | 104.4  |
| N6 <sup>iv</sup> —N6—N7                  | 107.9 (5)   | H5A <sup>viii</sup> —O5—H5B <sup>vii</sup>  | 50.6   |
| N6 <sup>iv</sup> —N6—H4 <sup>iv</sup>    | 97.2 (5)    | H5A <sup>ix</sup> —O5—H5B <sup>vii</sup>    | 129.4  |
| N7—N6—H4 <sup>iv</sup>                   | 128.1 (16)  | H5B <sup>v</sup> —O5—H5B <sup>vii</sup>     | 118.9  |
| N5—N7—N6                                 | 108.1 (8)   | H5B <sup>vi</sup> —O5—H5B <sup>vii</sup>    | 180.0  |
| H5A—O5—H5B                               | 104.4       | H5A—O5—H5B <sup>viii</sup>                  | 129.4  |
| H5A—O5—H5A <sup>v</sup>                  | 180.0       | H5B—O5—H5B <sup>viii</sup>                  | 118.9  |
| H5B—O5—H5A <sup>v</sup>                  | 75.6        | H5A <sup>v</sup> —O5—H5B <sup>viii</sup>    | 50.6   |
| H5A—O5—H5A <sup>vi</sup>                 | 114.0       | H5A <sup>vi</sup> —O5—H5B <sup>viii</sup>   | 15.5   |
| H5B—O5—H5A <sup>vi</sup>                 | 129.4       | H5A <sup>vii</sup> —O5—H5B <sup>viii</sup>  | 164.5  |
| H5A <sup>v</sup> —O5—H5A <sup>vi</sup>   | 66.0        | H5A <sup>viii</sup> —O5—H5B <sup>viii</sup> | 104.4  |
| H5A—O5—H5A <sup>vii</sup>                | 66.0        | H5A <sup>ix</sup> —O5—H5B <sup>viii</sup>   | 75.6   |
| H5B—O5—H5A <sup>vii</sup>                | 50.6        | H5B <sup>v</sup> —O5—H5B <sup>viii</sup>    | 61.1   |
| H5A <sup>v</sup> —O5—H5A <sup>vii</sup>  | 114.0       | H5B <sup>vi</sup> —O5—H5B <sup>viii</sup>   | 118.9  |
| H5A <sup>vi</sup> —O5—H5A <sup>vii</sup> | 180.0       | H5B <sup>vii</sup> —O5—H5B <sup>viii</sup>  | 61.1   |
| H5A—O5—H5A <sup>viii</sup>               | 114.0       | H5A—O5—H5B <sup>ix</sup>                    | 50.6   |
| H5B—O5—H5A <sup>viii</sup>               | 15.5        | H5B—O5—H5B <sup>ix</sup>                    | 61.1   |

|                                            |          |                                           |           |
|--------------------------------------------|----------|-------------------------------------------|-----------|
| H5A <sup>v</sup> —O5—H5A <sup>viii</sup>   | 66.0     | H5A <sup>v</sup> —O5—H5B <sup>ix</sup>    | 129.4     |
| H5A <sup>vi</sup> —O5—H5A <sup>viii</sup>  | 114.0    | H5A <sup>vi</sup> —O5—H5B <sup>ix</sup>   | 164.5     |
| H5A <sup>vii</sup> —O5—H5A <sup>viii</sup> | 66.0     | H5A <sup>vii</sup> —O5—H5B <sup>ix</sup>  | 15.5      |
| H5A—O5—H5A <sup>ix</sup>                   | 66.0     | H5A <sup>viii</sup> —O5—H5B <sup>ix</sup> | 75.6      |
| H5B—O5—H5A <sup>ix</sup>                   | 164.5    | H5A <sup>ix</sup> —O5—H5B <sup>ix</sup>   | 104.4     |
| H5A <sup>v</sup> —O5—H5A <sup>ix</sup>     | 114.0    | H5B <sup>v</sup> —O5—H5B <sup>ix</sup>    | 118.9     |
| H5A <sup>vi</sup> —O5—H5A <sup>ix</sup>    | 66.0     | H5B <sup>vi</sup> —O5—H5B <sup>ix</sup>   | 61.1      |
| H5A <sup>vii</sup> —O5—H5A <sup>ix</sup>   | 114.0    | H5B <sup>vii</sup> —O5—H5B <sup>ix</sup>  | 118.9     |
| H5A <sup>viii</sup> —O5—H5A <sup>ix</sup>  | 180.0    | H5B <sup>viii</sup> —O5—H5B <sup>ix</sup> | 180.0     |
| H5A—O5—H5B <sup>v</sup>                    | 75.6     |                                           |           |
|                                            |          |                                           |           |
| N3—N1—N2—N2 <sup>i</sup>                   | -0.3 (3) | N7 <sup>iv</sup> —N5—N7—N6                | -5.3 (16) |
| N2—N1—N3—N1 <sup>i</sup>                   | 0.4 (5)  | N6 <sup>iv</sup> —N6—N7—N5                | 3.3 (10)  |

Symmetry codes: (i)  $x, y, -z+1/2$ ; (ii)  $-x+y, -x+1, -z+1/2$ ; (iii)  $-y+1, x-y+1, -z+1/2$ ; (iv)  $x, y, -z+3/2$ ; (v)  $-x+2, -y+2, -z+1$ ; (vi)  $-y+2, x-y+1, z$ ; (vii)  $y, -x+y+1, -z+1$ ; (viii)  $-x+y+1, -x+2, z$ ; (ix)  $x-y+1, x, -z+1$ .

**Table S10.** Hydrogen bonds (Å, °) for **2**

| $D-H\cdots A$      | $D-H$ | $H\cdots A$ | $D\cdots A$ | $D-H\cdots A$ |
|--------------------|-------|-------------|-------------|---------------|
| O1—H1A $\cdots$ O4 | 0.85  | 2.18        | 2.87(3)     | 138           |
| O1—H1B $\cdots$ N5 | 0.85  | 2.54        | 2.851(17)   | 103           |
| O1—H1B $\cdots$ N6 | 0.85  | 2.42        | 3.242(9)    | 164           |
| O1—H1B $\cdots$ N7 | 0.85  | 2.20        | 2.975(10)   | 152           |
| O2—H2A $\cdots$ N6 | 0.93  | 1.96        | 2.837(10)   | 156           |
| O2—H2A $\cdots$ O4 | 0.93  | 1.83        | 2.74(2)     | 164           |
| O2—H2B $\cdots$ N2 | 0.88  | 1.95        | 2.829(6)    | 177           |

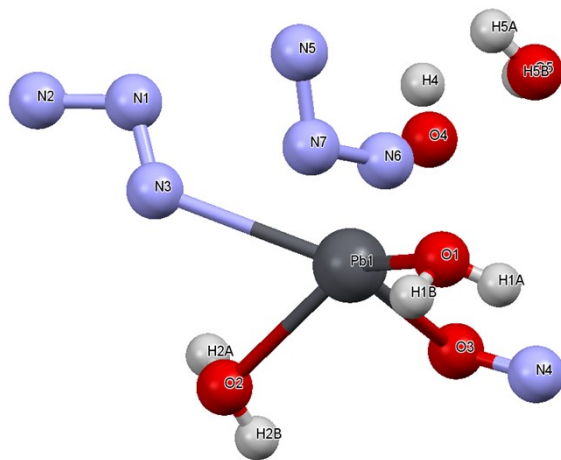

**Fig. S6** The asymmetric unit in CP **2**.

### 3. Single-crystal X-ray diffraction analysis of CP 3

**Table S11.** Crystal data, data collection, and refinement for CP 3

|                                                      |                                                                                                                                                         |
|------------------------------------------------------|---------------------------------------------------------------------------------------------------------------------------------------------------------|
| $\text{H}_{10}\text{N}_{16}\text{O}_{10}\text{Pb}_4$ | $D_x = 3.913 \text{ Mg m}^{-3}$                                                                                                                         |
| $M_r = 1223.00$                                      | Mo $K\alpha$ radiation, $\lambda = 0.71073 \text{ \AA}$                                                                                                 |
| Trigonal, $R3$                                       | Cell parameters from 3470 reflections                                                                                                                   |
| $a = 8.9224 (2) \text{ \AA}$                         | $\theta = 2.7\text{--}28.3^\circ$                                                                                                                       |
| $c = 22.5833 (4) \text{ \AA}$                        | $\mu = 32.42 \text{ mm}^{-1}$                                                                                                                           |
| $V = 1556.97 (8) \text{ \AA}^3$                      | $T = 296 \text{ K}$                                                                                                                                     |
| $Z = 3$                                              | Block, colourless                                                                                                                                       |
| $F(000) = 1590$                                      | $0.08 \times 0.07 \times 0.07 \text{ mm}$                                                                                                               |
| Bruker D8 QUEST PHOTON 100 diffractometer            | 1156 reflections with $I > 2\sigma(I)$                                                                                                                  |
| Detector resolution: $10.42 \text{ pixels mm}^{-1}$  | $R_{\text{int}} = 0.082$                                                                                                                                |
| $\phi$ and $\omega$ scans                            | $\theta_{\text{max}} = 24.9^\circ$ , $\theta_{\text{min}} = 2.7^\circ$                                                                                  |
| Absorption correction: multi-scan <i>SADABS</i>      | $h = -9 \rightarrow 10$                                                                                                                                 |
| $T_{\text{min}} = 0.029$ , $T_{\text{max}} = 0.096$  | $k = -10 \rightarrow 9$                                                                                                                                 |
| 3927 measured reflections                            | $l = -26 \rightarrow 26$                                                                                                                                |
| 1206 independent reflections                         |                                                                                                                                                         |
| Refinement on $F^2$                                  | Hydrogen site location: mixed                                                                                                                           |
| Least-squares matrix: full                           | H-atom parameters constrained                                                                                                                           |
| $R[F^2 > 2\sigma(F^2)] = 0.045$                      | $w = 1/[\sigma^2(F_o^2) + (0.0675P)^2]$<br>where $P = (F_o^2 + 2F_c^2)/3$                                                                               |
| $wR(F^2) = 0.114$                                    | $(\Delta/\sigma)_{\text{max}} < 0.001$                                                                                                                  |
| $S = 1.12$                                           | $\Delta_{\text{max}} = 1.12 \text{ e \AA}^{-3}$                                                                                                         |
| 1206 reflections                                     | $\Delta_{\text{min}} = -1.57 \text{ e \AA}^{-3}$                                                                                                        |
| 91 parameters                                        | Absolute structure: Flack $x$ determined using 536 quotients $[(I^+)-(I^-)]/[(I^+)+(I^-)]$ (Parsons, Flack and Wagner, Acta Cryst. B69 (2013) 249-259). |
| 1 restraint                                          | Absolute structure parameter: $0.09 (4)$                                                                                                                |

**Table S12.** Fractional atomic coordinates and isotropic or equivalent isotropic displacement parameters ( $\text{\AA}^2$ ) for 3

|     | $x$          | $y$          | $z$         | $U_{\text{iso}}^*/U_{\text{eq}}$ |
|-----|--------------|--------------|-------------|----------------------------------|
| Pb1 | 0.333333     | 0.666667     | 0.66633 (6) | 0.0303 (5)                       |
| Pb2 | 0.08311 (14) | 0.66408 (14) | 0.52963 (7) | 0.0334 (4)                       |
| O1  | 0.333333     | 0.666667     | 0.4873 (14) | 0.027 (7)                        |
| H1  | 0.333332     | 0.666667     | 0.443868    | 0.040*                           |

|     |            |           |             |            |
|-----|------------|-----------|-------------|------------|
| O2  | 0.330 (2)  | 0.846 (2) | 0.5892 (8)  | 0.028 (4)  |
| H2  | 0.328920   | 0.948889  | 0.603981    | 0.041*     |
| O3  | 0.146 (3)  | 0.011 (3) | 0.5223 (12) | 0.064 (8)  |
| O4  | 0.889 (4)  | 0.361 (4) | 0.4598 (16) | 0.080 (9)  |
| H4A | 0.959068   | 0.358592  | 0.434927    | 0.119*     |
| H4B | 0.886496   | 0.298192  | 0.488177    | 0.119*     |
| N1  | -0.204 (5) | 0.683 (5) | 0.7089 (15) | 0.072 (11) |
| N2  | -0.067 (5) | 0.681 (5) | 0.7321 (13) | 0.060 (8)  |
| N3  | -0.205 (4) | 0.669 (5) | 0.6517 (13) | 0.058 (9)  |
| N4  | -0.069 (4) | 0.657 (5) | 0.6381 (12) | 0.053 (7)  |
| N5  | 0.017 (3)  | 0.669 (4) | 0.6865 (12) | 0.036 (6)  |
| N6  | 0.000000   | 0.000000  | 0.525 (2)   | 0.044 (12) |

**Table S13.** Atomic displacement parameters ( $\text{\AA}^2$ ) for **3**

|     | $U^{11}$   | $U^{22}$   | $U^{33}$    | $U^{12}$   | $U^{13}$    | $U^{23}$    |
|-----|------------|------------|-------------|------------|-------------|-------------|
| Pb1 | 0.0308 (7) | 0.0308 (7) | 0.0293 (10) | 0.0154 (3) | 0.000       | 0.000       |
| Pb2 | 0.0313 (7) | 0.0377 (7) | 0.0354 (6)  | 0.0203 (5) | -0.0018 (5) | 0.0010 (5)  |
| O1  | 0.035 (12) | 0.035 (12) | 0.009 (16)  | 0.018 (6)  | 0.000       | 0.000       |
| O2  | 0.033 (11) | 0.026 (10) | 0.025 (9)   | 0.016 (8)  | -0.004 (7)  | 0.002 (7)   |
| O3  | 0.033 (14) | 0.057 (16) | 0.10 (2)    | 0.020 (13) | -0.006 (14) | -0.010 (14) |
| O4  | 0.09 (2)   | 0.060 (19) | 0.10 (3)    | 0.04 (2)   | 0.005 (19)  | 0.001 (16)  |
| N1  | 0.07 (2)   | 0.13 (4)   | 0.046 (19)  | 0.08 (3)   | -0.006 (17) | -0.02 (2)   |
| N2  | 0.07 (2)   | 0.08 (2)   | 0.044 (17)  | 0.05 (2)   | -0.007 (15) | -0.011 (16) |
| N3  | 0.030 (15) | 0.11 (3)   | 0.046 (16)  | 0.042 (17) | -0.003 (13) | 0.002 (17)  |
| N4  | 0.07 (2)   | 0.08 (2)   | 0.035 (15)  | 0.056 (19) | 0.013 (14)  | 0.010 (15)  |
| N5  | 0.017 (12) | 0.046 (17) | 0.044 (15)  | 0.014 (11) | -0.006 (10) | 0.002 (11)  |
| N6  | 0.021 (14) | 0.021 (14) | 0.09 (4)    | 0.011 (7)  | 0.000       | 0.000       |

**Table S14.** Geometric parameters ( $\text{\AA}$ ,  $^\circ$ ) for **3**

|                      |            |        |          |
|----------------------|------------|--------|----------|
| Pb1—O2               | 2.377 (18) | O3—N6  | 1.26 (3) |
| Pb1—O2 <sup>i</sup>  | 2.377 (18) | O4—H4A | 0.8509   |
| Pb1—O2 <sup>ii</sup> | 2.377 (18) | O4—H4B | 0.8455   |
| Pb2—O2               | 2.393 (19) | N1—N3  | 1.30 (4) |
| Pb2—O2 <sup>i</sup>  | 2.409 (19) | N1—N2  | 1.33 (5) |
| Pb2—O1               | 2.418 (12) | N2—N5  | 1.31 (4) |
| Pb2—N4               | 2.79 (3)   | N3—N4  | 1.31 (4) |
| O1—H1                | 0.9800     | N4—N5  | 1.31 (4) |
| O2—H2                | 0.9800     |        |          |

|                                        |           |                                        |           |
|----------------------------------------|-----------|----------------------------------------|-----------|
|                                        |           |                                        |           |
| O2—Pb1—O2 <sup>i</sup>                 | 72.2 (7)  | Pb1—O2—Pb2 <sup>ii</sup>               | 105.2 (7) |
| O2—Pb1—O2 <sup>ii</sup>                | 72.2 (7)  | Pb2—O2—Pb2 <sup>ii</sup>               | 106.5 (7) |
| O2 <sup>i</sup> —Pb1—O2 <sup>ii</sup>  | 72.2 (7)  | Pb1—O2—H2                              | 112.9     |
| O2—Pb2—O2 <sup>i</sup>                 | 71.3 (9)  | Pb2—O2—H2                              | 112.9     |
| O2—Pb2—O1                              | 71.5 (7)  | Pb2 <sup>ii</sup> —O2—H2               | 112.9     |
| O2 <sup>i</sup> —Pb2—O1                | 71.3 (7)  | H4A—O4—H4B                             | 104.8     |
| O2—Pb2—N4                              | 78.1 (8)  | N3—N1—N2                               | 111 (3)   |
| O2 <sup>i</sup> —Pb2—N4                | 77.3 (7)  | N5—N2—N1                               | 105 (3)   |
| O1—Pb2—N4                              | 141.7 (9) | N1—N3—N4                               | 106 (3)   |
| Pb2 <sup>ii</sup> —O1—Pb2 <sup>i</sup> | 105.4 (8) | N5—N4—N3                               | 109 (3)   |
| Pb2 <sup>ii</sup> —O1—Pb2              | 105.4 (8) | N5—N4—Pb2                              | 118 (2)   |
| Pb2 <sup>i</sup> —O1—Pb2               | 105.4 (8) | N3—N4—Pb2                              | 132 (2)   |
| Pb2 <sup>ii</sup> —O1—H1               | 113.3     | N4—N5—N2                               | 109 (3)   |
| Pb2 <sup>i</sup> —O1—H1                | 113.3     | O3 <sup>iii</sup> —N6—O3               | 119.8 (5) |
| Pb2—O1—H1                              | 113.3     | O3 <sup>iii</sup> —N6—O3 <sup>iv</sup> | 119.8 (5) |
| Pb1—O2—Pb2                             | 105.7 (7) | O3—N6—O3 <sup>iv</sup>                 | 119.8 (5) |
|                                        |           |                                        |           |
| N3—N1—N2—N5                            | 1 (5)     | N3—N4—N5—N2                            | 2 (4)     |
| N2—N1—N3—N4                            | 0 (5)     | Pb2—N4—N5—N2                           | 173 (3)   |
| N1—N3—N4—N5                            | -1 (5)    | N1—N2—N5—N4                            | -2 (4)    |
| N1—N3—N4—Pb2                           | -171 (3)  |                                        |           |

Symmetry codes: (i)  $-y+1, x-y+1, z$ ; (ii)  $-x+y, -x+1, z$ ; (iii)  $-x+y, -x, z$ ; (iv)  $-y, x-y, z$ .

**Table S15.** Hydrogen bonds (Å, °) for **3**

| $D-H\cdots A$                     | $D-H$ | $H\cdots A$ | $D\cdots A$ | $D-H\cdots A$ |
|-----------------------------------|-------|-------------|-------------|---------------|
| O2—H2 $\cdots$ N3 <sup>v</sup>    | 0.98  | 1.91        | 2.86 (3)    | 166           |
| O4—H4A $\cdots$ N1 <sup>vi</sup>  | 0.85  | 2.06        | 2.91 (5)    | 179           |
| O4—H4B $\cdots$ O3 <sup>vii</sup> | 0.85  | 2.21        | 2.94 (4)    | 145           |

Symmetry codes: (v)  $-y+1, x-y+2, z$ ; (vi)  $x+4/3, y-1/3, z-1/3$ ; (vii)  $-y+1, x-y, z$ .

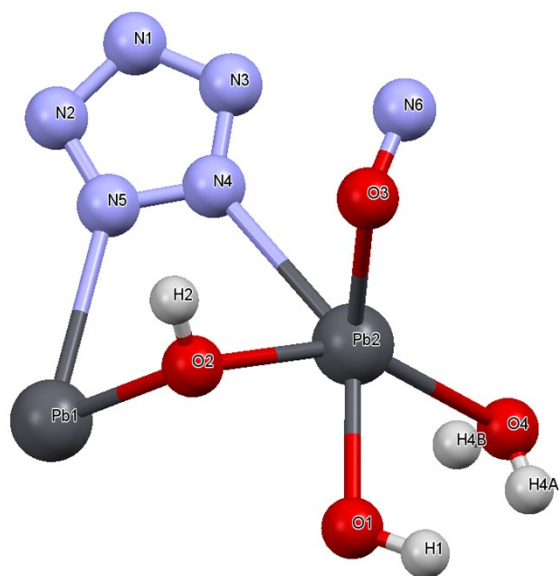

**Fig. S7** The asymmetric unit in CP 3.

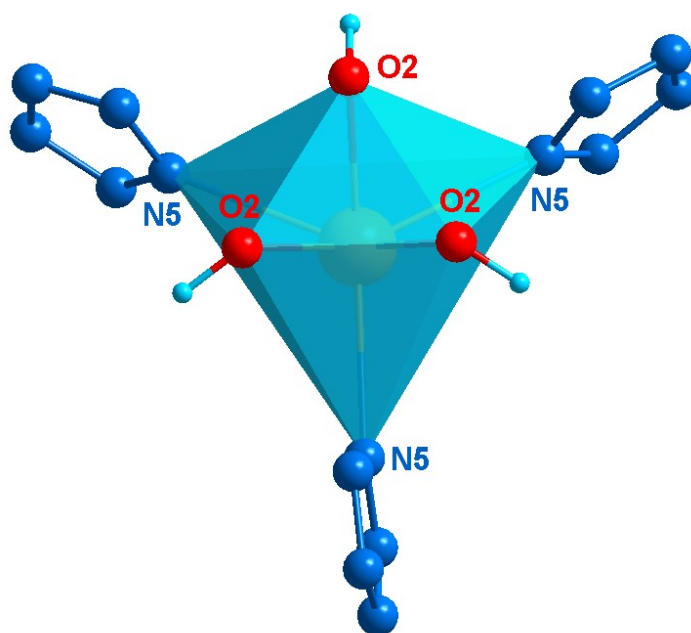

**Fig. S8** Coordination environment of the Pb1<sup>2+</sup> ion in CP 3.



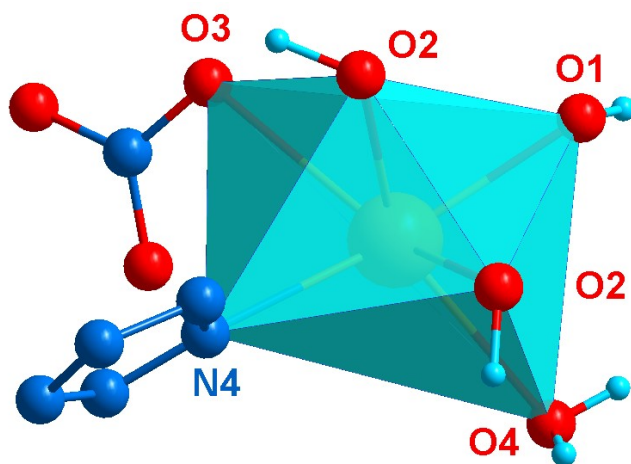

**Fig. S9** Coordination environment of the  $\text{Pb}^{2+}$  ion in CP 3.

#### 4. Single-crystal X-ray diffraction analysis of CP 4

**Table S16.** Crystal data, data collection, and refinement for CP 4

|                                                     |                                                                           |
|-----------------------------------------------------|---------------------------------------------------------------------------|
| $\text{ClH}_6\text{N}_{15}\text{O}_9\text{Pb}_4$    | $D_x = 4.417 \text{ Mg m}^{-3}$                                           |
| $M_r = 1224.41$                                     | Mo $K\alpha$ radiation, $\lambda = 0.71073 \text{ \AA}$                   |
| Orthorhombic, $Pca2_1$                              | Cell parameters from 9944 reflections                                     |
| $a = 10.1088 (8) \text{ \AA}$                       | $\theta = 2.5\text{--}27.5^\circ$                                         |
| $b = 13.5520 (11) \text{ \AA}$                      | $\mu = 36.69 \text{ mm}^{-1}$                                             |
| $c = 13.4401 (9) \text{ \AA}$                       | $T = 296 \text{ K}$                                                       |
| $V = 1841.2 (2) \text{ \AA}^3$                      | Block, colourless                                                         |
| $Z = 4$                                             | $0.02 \times 0.02 \times 0.02 \text{ mm}$                                 |
| $F(000) = 2112$                                     |                                                                           |
| Bruker D8 QUEST PHOTON 100 diffractometer           | 3669 reflections with $I > 2\sigma(I)$                                    |
| Detector resolution: $10.42 \text{ pixels mm}^{-1}$ | $R_{\text{int}} = 0.066$                                                  |
| $\phi$ and $\omega$ scans                           | $\theta_{\text{max}} = 27.6^\circ$ , $\theta_{\text{min}} = 2.9^\circ$    |
| Absorption correction: multi-scan <i>SADABS</i>     | $h = -12 \rightarrow 13$                                                  |
| $T_{\text{min}} = 0.565$ , $T_{\text{max}} = 0.746$ | $k = -17 \rightarrow 15$                                                  |
| 17903 measured reflections                          | $l = -14 \rightarrow 17$                                                  |
| 3982 independent reflections                        |                                                                           |
| Refinement on $F^2$                                 | Hydrogen site location: mixed                                             |
| Least-squares matrix: full                          | H-atom parameters constrained                                             |
| $R[F^2 > 2\sigma(F^2)] = 0.028$                     | $w = 1/[\sigma^2(F_o^2) + (0.0178P)^2]$<br>where $P = (F_o^2 + 2F_c^2)/3$ |
| $wR(F^2) = 0.054$                                   | $(\Delta/\sigma)_{\text{max}} = 0.001$                                    |

|                  |                                                    |
|------------------|----------------------------------------------------|
| $S = 1.01$       | $\Delta_{\max} = 1.19 \text{ e } \text{\AA}^{-3}$  |
| 3982 reflections | $\Delta_{\min} = -1.25 \text{ e } \text{\AA}^{-3}$ |
| 263 parameters   | Absolute structure: Refined as an inversion twin.  |
| 1 restraint      | Absolute structure parameter: 0.034 (15)           |

**Table S17.** Fractional atomic coordinates and isotropic or equivalent isotropic displacement parameters ( $\text{\AA}^2$ ) for **4**

|     | x           | y           | z            | $U_{\text{iso}}^*/U_{\text{eq}}$ |
|-----|-------------|-------------|--------------|----------------------------------|
| Pb1 | 0.78990 (5) | 0.35207 (3) | 0.25098 (4)  | 0.02531 (13)                     |
| Pb2 | 1.14069 (5) | 0.29182 (4) | 0.34914 (4)  | 0.02577 (13)                     |
| Pb3 | 1.03794 (5) | 0.20994 (4) | 0.08328 (4)  | 0.02620 (13)                     |
| Pb4 | 0.88389 (5) | 0.08651 (4) | 0.31274 (4)  | 0.02916 (14)                     |
| N1  | 0.9138 (12) | 0.4833 (9)  | 0.3774 (9)   | 0.031 (3)                        |
| N2  | 1.0437 (12) | 0.4845 (8)  | 0.3793 (8)   | 0.030 (3)                        |
| N3  | 1.0820 (13) | 0.5640 (9)  | 0.4256 (10)  | 0.035 (3)                        |
| N4  | 0.9761 (13) | 0.6118 (9)  | 0.4533 (10)  | 0.035 (3)                        |
| N5  | 0.8705 (12) | 0.5628 (9)  | 0.4234 (10)  | 0.034 (3)                        |
| N6  | 0.5469 (12) | 0.5923 (10) | 0.5891 (11)  | 0.038 (3)                        |
| N7  | 0.6086 (16) | 0.5530 (12) | 0.6657 (12)  | 0.055 (4)                        |
| N8  | 0.7196 (14) | 0.6040 (11) | 0.6772 (11)  | 0.049 (4)                        |
| N9  | 0.7265 (12) | 0.6730 (10) | 0.6086 (9)   | 0.031 (3)                        |
| N10 | 0.6185 (13) | 0.6642 (10) | 0.5550 (10)  | 0.037 (3)                        |
| N11 | 0.8475 (15) | 0.8835 (10) | -0.0192 (10) | 0.043 (3)                        |
| N12 | 0.9438 (16) | 0.9482 (10) | -0.0238 (10) | 0.045 (4)                        |
| N13 | 0.9310 (16) | 1.0099 (10) | 0.0516 (10)  | 0.048 (4)                        |
| N14 | 0.8270 (16) | 0.9802 (11) | 0.1021 (12)  | 0.057 (4)                        |
| N15 | 0.7765 (14) | 0.9036 (9)  | 0.0591 (12)  | 0.050 (4)                        |
| O1  | 0.8287 (9)  | 0.1915 (6)  | 0.1798 (7)   | 0.028 (2)                        |
| H1A | 0.754509    | 0.167209    | 0.139679     | 0.034*                           |
| O2  | 0.9144 (9)  | 0.2498 (6)  | 0.3722 (7)   | 0.025 (2)                        |
| H2A | 0.884236    | 0.258711    | 0.440925     | 0.031*                           |
| O3  | 1.0061 (9)  | 0.3422 (6)  | 0.2020 (7)   | 0.024 (2)                        |
| H3A | 1.036881    | 0.405342    | 0.174963     | 0.028*                           |
| O4  | 1.0837 (9)  | 0.1451 (6)  | 0.2443 (7)   | 0.0235 (19)                      |
| H4A | 1.153605    | 0.095008    | 0.243719     | 0.028*                           |
| Cl1 | 0.4716 (4)  | 0.8347 (3)  | 0.8044 (3)   | 0.0366 (8)                       |
| O5  | 0.4762 (14) | 0.7583 (11) | 0.7321 (13)  | 0.077 (5)                        |
| O6  | 0.5978 (10) | 0.8460 (9)  | 0.8512 (11)  | 0.052 (3)                        |

|     |             |            |             |           |
|-----|-------------|------------|-------------|-----------|
| O7  | 0.4331 (12) | 0.9264 (9) | 0.7599 (11) | 0.054 (3) |
| O8  | 0.3730 (11) | 0.8098 (9) | 0.8789 (10) | 0.053 (3) |
| O9  | 0.7222 (11) | 0.3540 (9) | 0.0524 (9)  | 0.052 (3) |
| H9A | 0.781053    | 0.378356   | 0.014507    | 0.077*    |
| H9B | 0.654513    | 0.389956   | 0.042907    | 0.077*    |

**Table S18.** Atomic displacement parameters ( $\text{\AA}^2$ ) for **4**

|     | $U^{11}$   | $U^{22}$    | $U^{33}$   | $U^{12}$     | $U^{13}$     | $U^{23}$     |
|-----|------------|-------------|------------|--------------|--------------|--------------|
| Pb1 | 0.0258 (3) | 0.0216 (2)  | 0.0285 (3) | 0.0054 (2)   | 0.0003 (2)   | -0.0034 (2)  |
| Pb2 | 0.0241 (3) | 0.0275 (3)  | 0.0257 (3) | -0.0007 (2)  | -0.0017 (2)  | -0.0033 (2)  |
| Pb3 | 0.0365 (3) | 0.0219 (3)  | 0.0202 (2) | 0.0024 (2)   | 0.0019 (2)   | -0.0015 (2)  |
| Pb4 | 0.0345 (3) | 0.0181 (3)  | 0.0349 (3) | -0.0034 (2)  | 0.0012 (2)   | 0.0061 (2)   |
| N1  | 0.036 (7)  | 0.027 (7)   | 0.031 (7)  | -0.001 (6)   | -0.007 (6)   | -0.002 (5)   |
| N2  | 0.044 (8)  | 0.023 (6)   | 0.024 (6)  | -0.001 (5)   | -0.005 (5)   | -0.004 (5)   |
| N3  | 0.030 (7)  | 0.028 (7)   | 0.047 (8)  | 0.002 (5)    | 0.001 (6)    | 0.004 (6)    |
| N4  | 0.041 (8)  | 0.020 (7)   | 0.045 (8)  | 0.007 (6)    | 0.000 (6)    | 0.002 (5)    |
| N5  | 0.028 (7)  | 0.031 (7)   | 0.042 (8)  | -0.004 (5)   | 0.002 (6)    | -0.007 (6)   |
| N6  | 0.037 (7)  | 0.042 (8)   | 0.035 (7)  | -0.012 (6)   | -0.002 (6)   | 0.000 (6)    |
| N7  | 0.075 (11) | 0.049 (9)   | 0.041 (9)  | -0.026 (8)   | -0.018 (8)   | 0.006 (7)    |
| N8  | 0.049 (9)  | 0.057 (9)   | 0.041 (9)  | -0.016 (7)   | -0.015 (7)   | 0.026 (7)    |
| N9  | 0.029 (7)  | 0.043 (7)   | 0.023 (6)  | 0.002 (6)    | -0.005 (5)   | 0.005 (5)    |
| N10 | 0.040 (8)  | 0.033 (7)   | 0.037 (8)  | -0.005 (6)   | 0.002 (6)    | 0.007 (6)    |
| N11 | 0.054 (9)  | 0.038 (8)   | 0.038 (8)  | -0.014 (7)   | 0.014 (7)    | -0.020 (7)   |
| N12 | 0.075 (11) | 0.032 (8)   | 0.029 (8)  | -0.017 (7)   | 0.019 (7)    | -0.003 (6)   |
| N13 | 0.072 (10) | 0.035 (8)   | 0.037 (8)  | -0.016 (7)   | 0.012 (7)    | -0.013 (6)   |
| N14 | 0.072 (10) | 0.030 (8)   | 0.068 (11) | -0.013 (7)   | 0.032 (9)    | -0.020 (7)   |
| N15 | 0.055 (10) | 0.024 (7)   | 0.070 (11) | -0.011 (6)   | 0.011 (8)    | 0.000 (7)    |
| O1  | 0.031 (5)  | 0.020 (5)   | 0.033 (6)  | 0.003 (4)    | -0.003 (5)   | -0.005 (4)   |
| O2  | 0.028 (5)  | 0.019 (5)   | 0.029 (5)  | -0.001 (4)   | 0.004 (4)    | -0.003 (4)   |
| O3  | 0.028 (5)  | 0.009 (4)   | 0.034 (5)  | 0.000 (4)    | 0.000 (4)    | -0.001 (4)   |
| O4  | 0.025 (5)  | 0.023 (5)   | 0.023 (5)  | 0.006 (4)    | -0.002 (4)   | 0.003 (4)    |
| C11 | 0.036 (2)  | 0.0279 (19) | 0.046 (2)  | -0.0027 (14) | -0.0046 (17) | -0.0005 (17) |
| O5  | 0.063 (9)  | 0.072 (10)  | 0.095 (13) | -0.012 (7)   | 0.012 (8)    | -0.046 (10)  |
| O6  | 0.031 (6)  | 0.056 (8)   | 0.069 (8)  | -0.006 (5)   | -0.011 (6)   | 0.018 (6)    |
| O7  | 0.058 (8)  | 0.040 (7)   | 0.064 (8)  | -0.004 (5)   | -0.009 (7)   | 0.020 (6)    |
| O8  | 0.045 (7)  | 0.053 (7)   | 0.061 (9)  | -0.010 (6)   | 0.003 (6)    | 0.015 (6)    |
| O9  | 0.042 (7)  | 0.063 (9)   | 0.049 (7)  | 0.004 (6)    | 0.003 (6)    | 0.030 (6)    |

**Table S19.** Geometric parameters ( $\text{\AA}$ ,  $^\circ$ ) for **4**

|           |            |             |            |
|-----------|------------|-------------|------------|
| Pb1—O3    | 2.286 (9)  | N3—N4       | 1.306 (17) |
| Pb1—O1    | 2.410 (9)  | N4—N5       | 1.320 (17) |
| Pb1—O2    | 2.482 (9)  | N6—N10      | 1.298 (18) |
| Pb1—O9    | 2.755 (12) | N6—N7       | 1.32 (2)   |
| Pb1—N1    | 2.760 (12) | N7—N8       | 1.326 (19) |
| Pb2—O2    | 2.378 (9)  | N8—N9       | 1.314 (18) |
| Pb2—O3    | 2.496 (9)  | N9—N10      | 1.314 (17) |
| Pb2—O4    | 2.504 (9)  | N11—N15     | 1.303 (19) |
| Pb3—O4    | 2.381 (9)  | N11—N12     | 1.312 (19) |
| Pb3—O3    | 2.422 (9)  | N12—N13     | 1.320 (18) |
| Pb3—O1    | 2.494 (10) | N13—N14     | 1.314 (19) |
| Pb4—O1    | 2.351 (10) | N14—N15     | 1.292 (19) |
| Pb4—O4    | 2.357 (9)  | Cl1—O5      | 1.419 (14) |
| Pb4—O2    | 2.373 (9)  | Cl1—O6      | 1.432 (12) |
| N1—N2     | 1.313 (16) | Cl1—O7      | 1.434 (12) |
| N1—N5     | 1.318 (17) | Cl1—O8      | 1.453 (12) |
| N2—N3     | 1.303 (17) |             |            |
|           |            |             |            |
| O3—Pb1—O1 | 71.2 (3)   | N6—N7—N8    | 106.3 (13) |
| O3—Pb1—O2 | 70.8 (3)   | N9—N8—N7    | 109.5 (13) |
| O1—Pb1—O2 | 71.0 (3)   | N10—N9—N8   | 106.1 (12) |
| O3—Pb1—O9 | 87.7 (3)   | N6—N10—N9   | 109.7 (12) |
| O1—Pb1—O9 | 70.4 (3)   | N15—N11—N12 | 107.9 (12) |
| O2—Pb1—O9 | 140.1 (3)  | N11—N12—N13 | 108.3 (13) |
| O3—Pb1—N1 | 77.3 (4)   | N14—N13—N12 | 106.3 (13) |
| O1—Pb1—N1 | 138.8 (3)  | N15—N14—N13 | 109.4 (14) |
| O2—Pb1—N1 | 74.1 (3)   | N14—N15—N11 | 108.2 (13) |
| O9—Pb1—N1 | 134.7 (3)  | Pb4—O1—Pb1  | 106.4 (4)  |
| O2—Pb2—O3 | 69.2 (3)   | Pb4—O1—Pb3  | 104.8 (3)  |
| O2—Pb2—O4 | 70.2 (3)   | Pb1—O1—Pb3  | 104.7 (3)  |
| O3—Pb2—O4 | 69.3 (3)   | Pb4—O2—Pb2  | 107.7 (3)  |
| O4—Pb3—O3 | 72.6 (3)   | Pb4—O2—Pb1  | 103.5 (3)  |
| O4—Pb3—O1 | 69.8 (3)   | Pb2—O2—Pb1  | 105.6 (3)  |
| O3—Pb3—O1 | 67.6 (3)   | Pb1—O3—Pb3  | 111.1 (4)  |
| O1—Pb4—O4 | 72.7 (3)   | Pb1—O3—Pb2  | 108.0 (4)  |
| O1—Pb4—O2 | 73.9 (3)   | Pb3—O3—Pb2  | 104.3 (3)  |
| O4—Pb4—O2 | 72.9 (3)   | Pb4—O4—Pb3  | 108.2 (3)  |
| N2—N1—N5  | 108.2 (11) | Pb4—O4—Pb2  | 104.2 (3)  |
| N2—N1—Pb1 | 118.3 (8)  | Pb3—O4—Pb2  | 105.2 (3)  |

|              |            |                 |            |
|--------------|------------|-----------------|------------|
| N5—N1—Pb1    | 131.7 (9)  | O5—C11—O6       | 110.5 (9)  |
| N3—N2—N1     | 108.5 (11) | O5—C11—O7       | 110.8 (10) |
| N2—N3—N4     | 107.6 (12) | O6—C11—O7       | 109.4 (7)  |
| N3—N4—N5     | 109.1 (12) | O5—C11—O8       | 109.0 (8)  |
| N1—N5—N4     | 106.6 (11) | O6—C11—O8       | 109.5 (8)  |
| N10—N6—N7    | 108.4 (13) | O7—C11—O8       | 107.6 (8)  |
|              |            |                 |            |
| N5—N1—N2—N3  | -0.3 (15)  | N7—N8—N9—N10    | 0.2 (18)   |
| Pb1—N1—N2—N3 | 166.3 (9)  | N7—N6—N10—N9    | -0.2 (18)  |
| N1—N2—N3—N4  | 0.6 (15)   | N8—N9—N10—N6    | 0.0 (17)   |
| N2—N3—N4—N5  | -0.7 (16)  | N15—N11—N12—N13 | -1 (2)     |
| N2—N1—N5—N4  | -0.1 (15)  | N11—N12—N13—N14 | 1 (2)      |
| Pb1—N1—N5—N4 | -164.2 (9) | N12—N13—N14—N15 | -1 (2)     |
| N3—N4—N5—N1  | 0.5 (16)   | N13—N14—N15—N11 | 0 (2)      |
| N10—N6—N7—N8 | 0.3 (19)   | N12—N11—N15—N14 | 1 (2)      |
| N6—N7—N8—N9  | -0.3 (19)  |                 |            |

**Table S20.** Hydrogen bonds (Å, °) for **4**

| <i>D—H</i> ⋯ <i>A</i> | <i>D—H</i> | <i>H</i> ⋯ <i>A</i> | <i>D</i> ⋯ <i>A</i> | <i>D—H</i> ⋯ <i>A</i> |
|-----------------------|------------|---------------------|---------------------|-----------------------|
| O4—H4A⋯N1             | 0.91(4)    | 2.18(4)             | 3.009(3)            | 153(4)                |
| O4—H4B⋯N1             | 0.97(7)    | 2.55(6)             | 3.508(4)            | 168(5)                |
| N6—H6⋯O3              | 0.95(4)    | 1.74(4)             | 2.671(3)            | 167(3)                |
| N7—H7A⋯N5             | 0.88       | 2.16                | 3.025(3)            | 167                   |
| N7—H7B⋯O3             | 0.88       | 2.06                | 2.725(3)            | 132                   |
| N7—H7B⋯O4             | 0.88       | 2.22                | 2.865(3)            | 130                   |

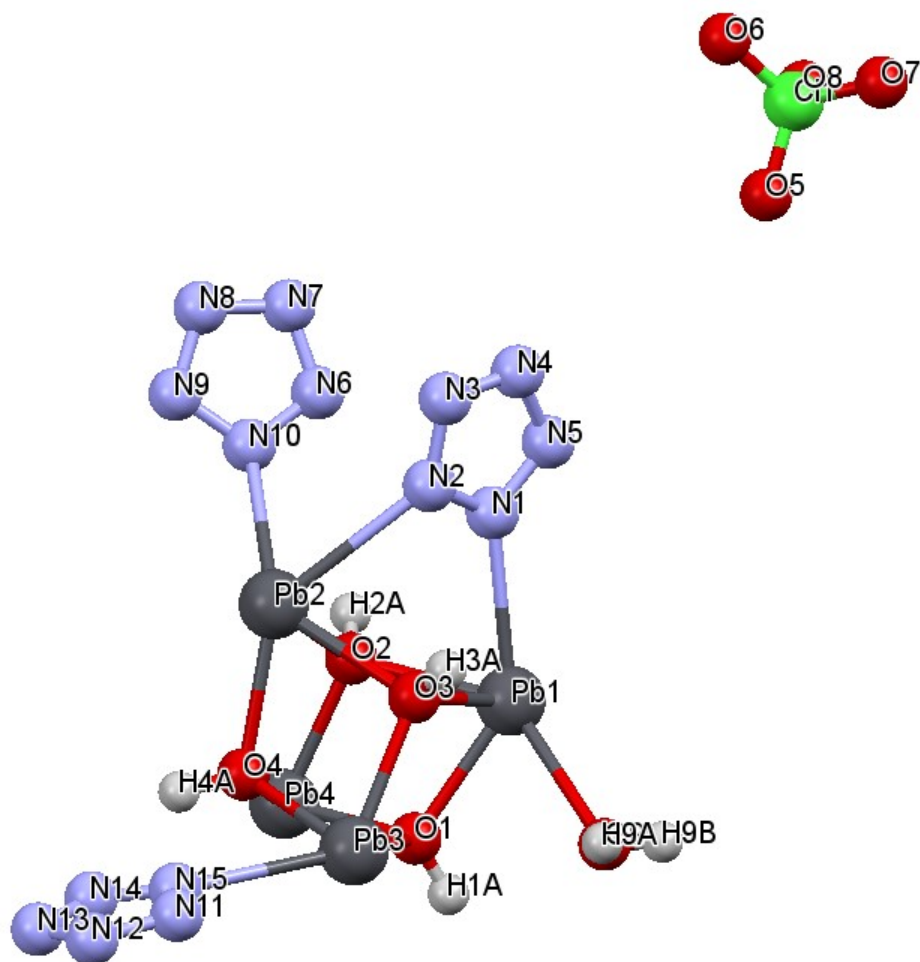

**Fig. S10** The asymmetric unit in CP 4.

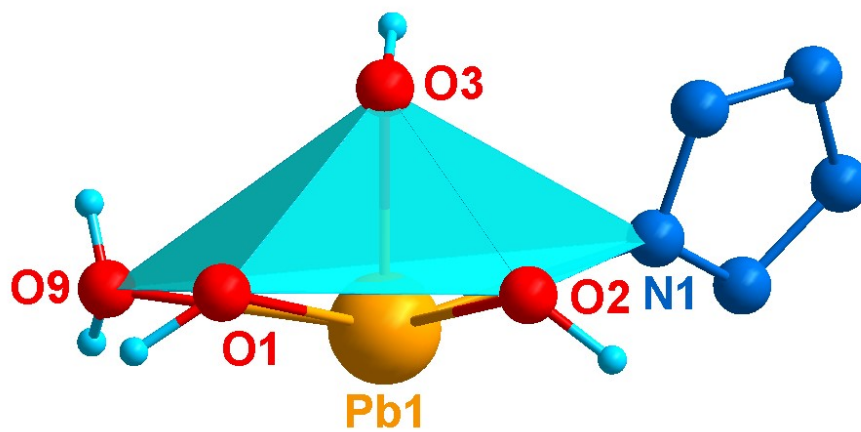

**Fig. S11** Coordination environment of the  $\text{Pb1}^{2+}$  ion in CP 4.

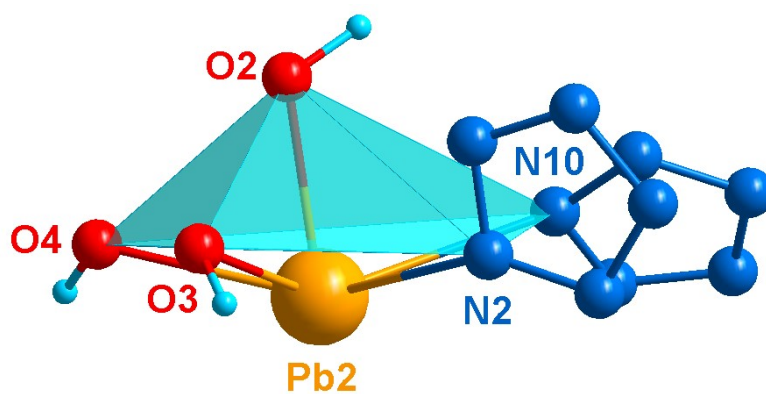

**Fig. S12** Coordination environment of the  $\text{Pb}^{2+}$  ion in CP 4.

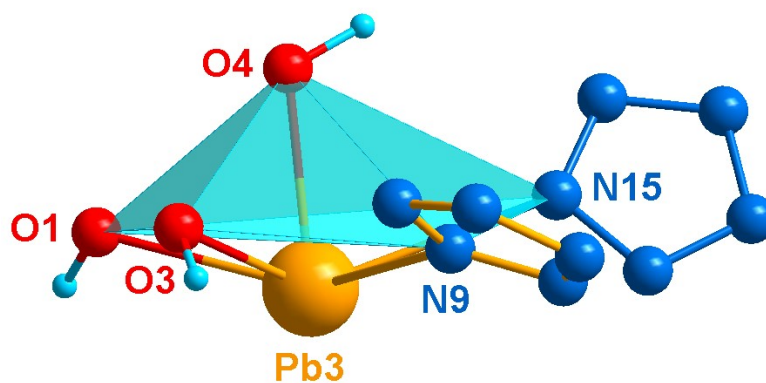

**Fig. S13** Coordination environment of the  $\text{Pb}^{3+}$  ion in CP 4.

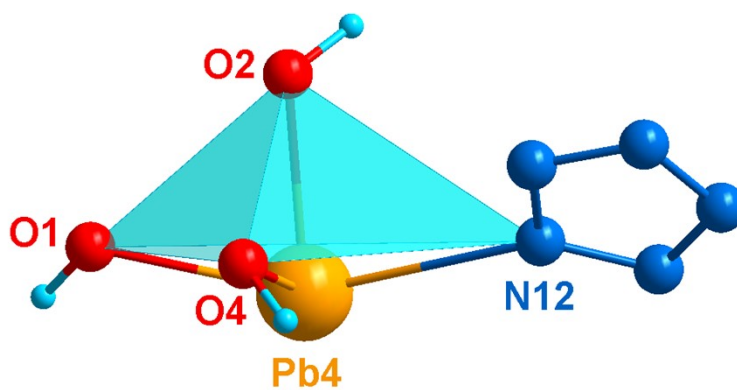

**Fig. S14** Coordination environment of the  $\text{Pb}^{4+}$  ion in CP 4.

## 5. High-resolution mass spectra of CPs 1-4

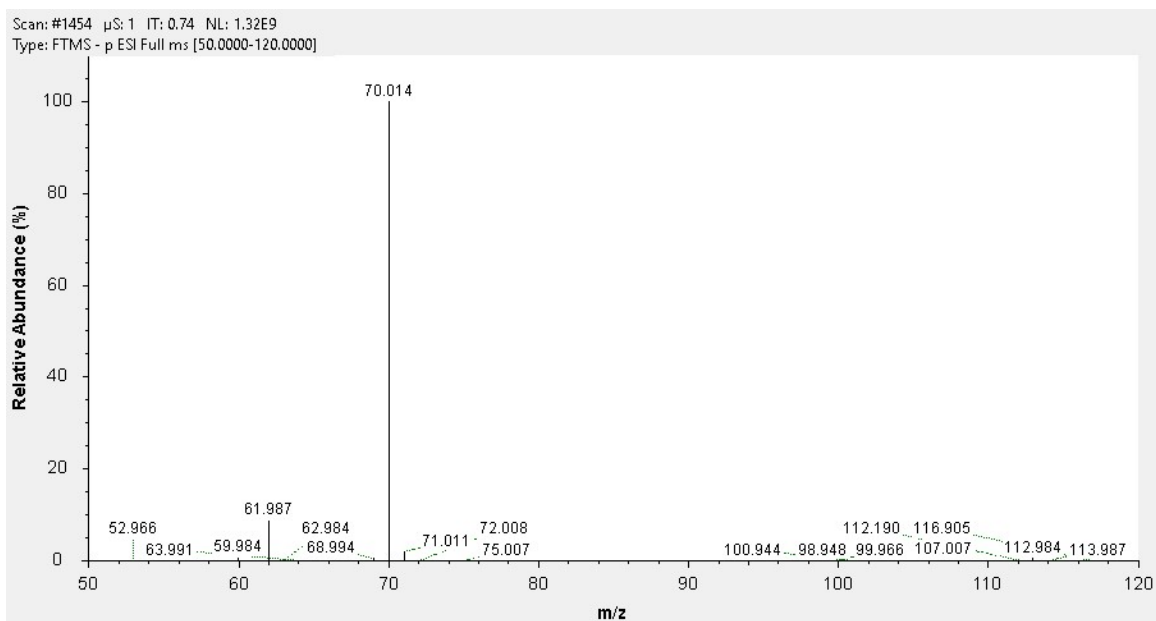

**Fig. S15** High-resolution mass spectrum of CP 1 (negative ion mode).

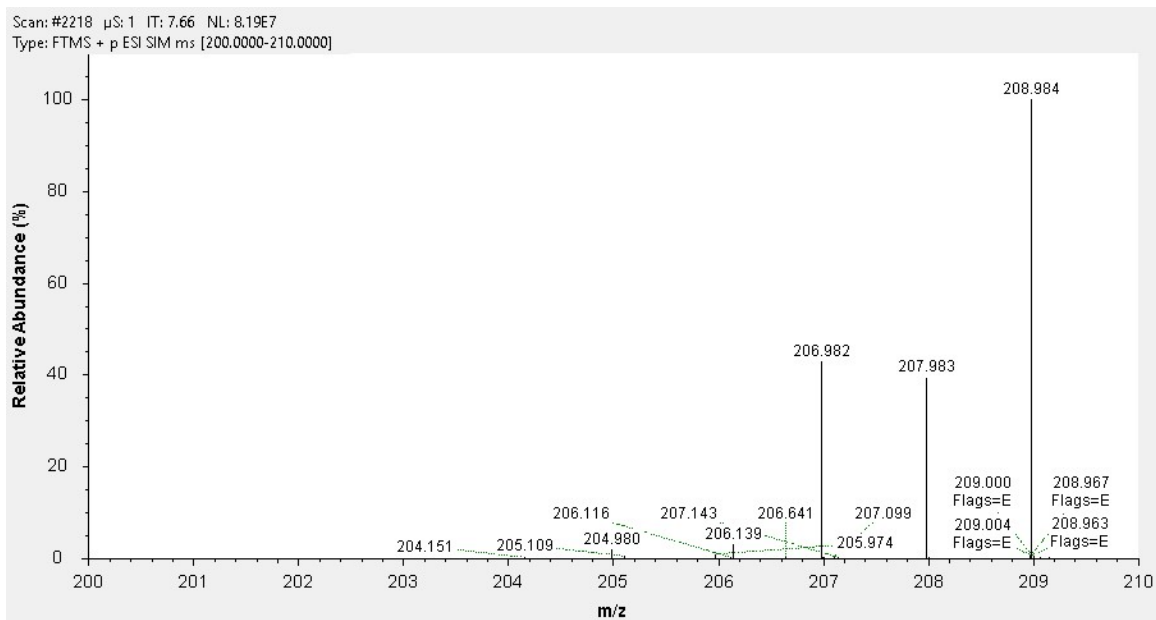

**Fig. S16** High-resolution mass spectrum of CP 1 (positive ion mode).



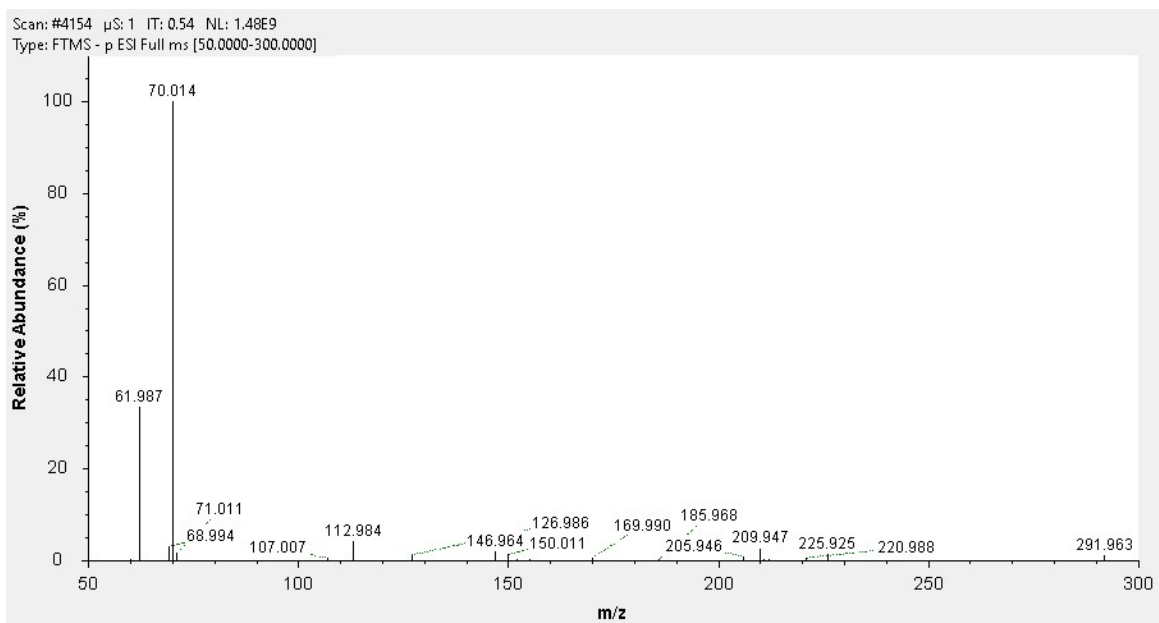

**Fig. S17** High-resolution mass spectrum of CP 2 (negative ion mode).

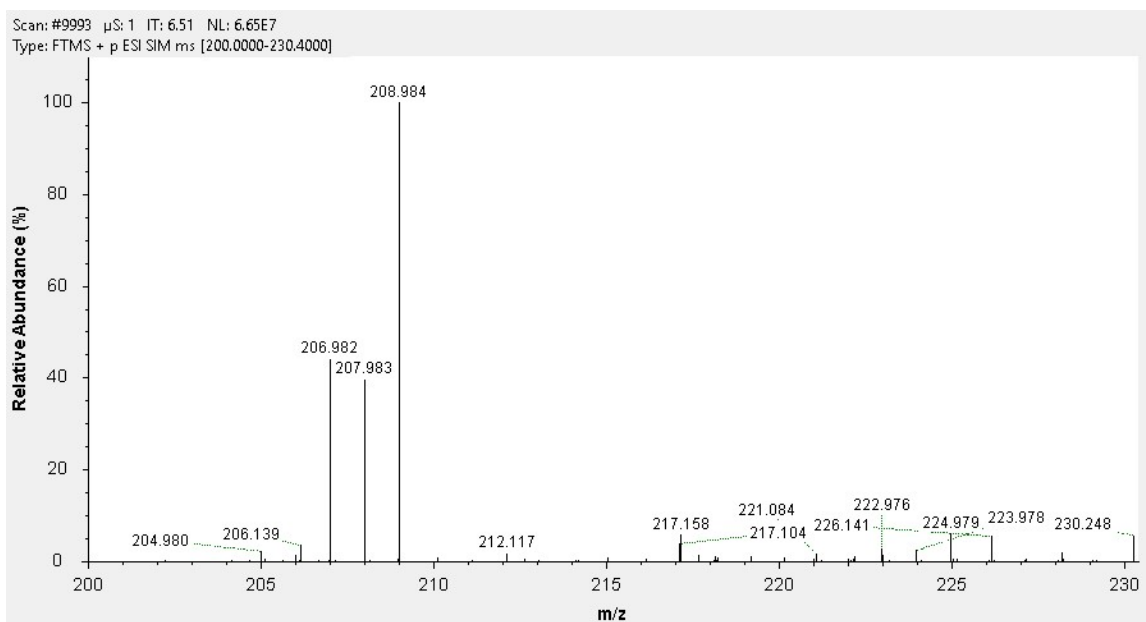

**Fig. S18** High-resolution mass spectrum of CP 2 (positive ion mode).

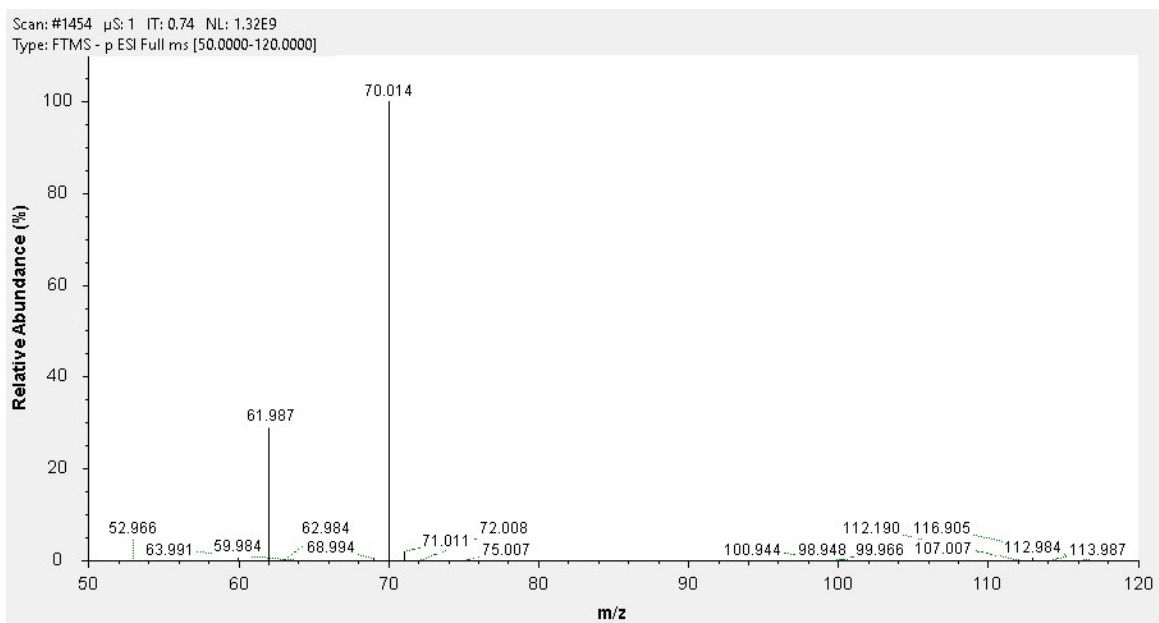

**Fig. S19** High-resolution mass spectrum of CP 3 (negative ion mode).

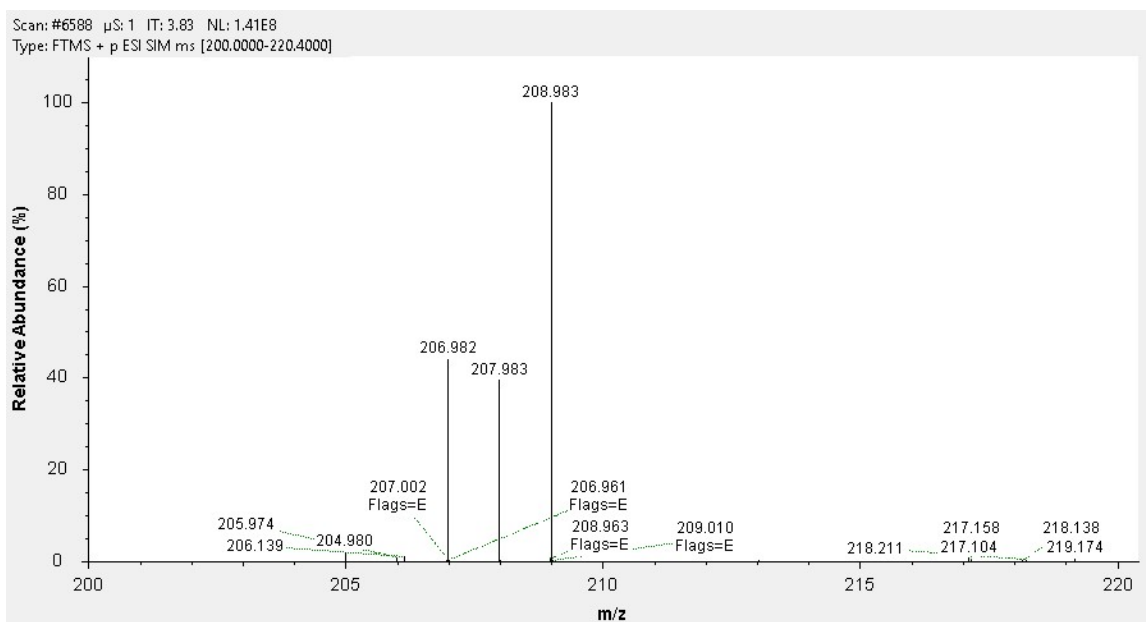

**Fig. S20** High-resolution mass spectrum of CP 3 (positive ion mode).

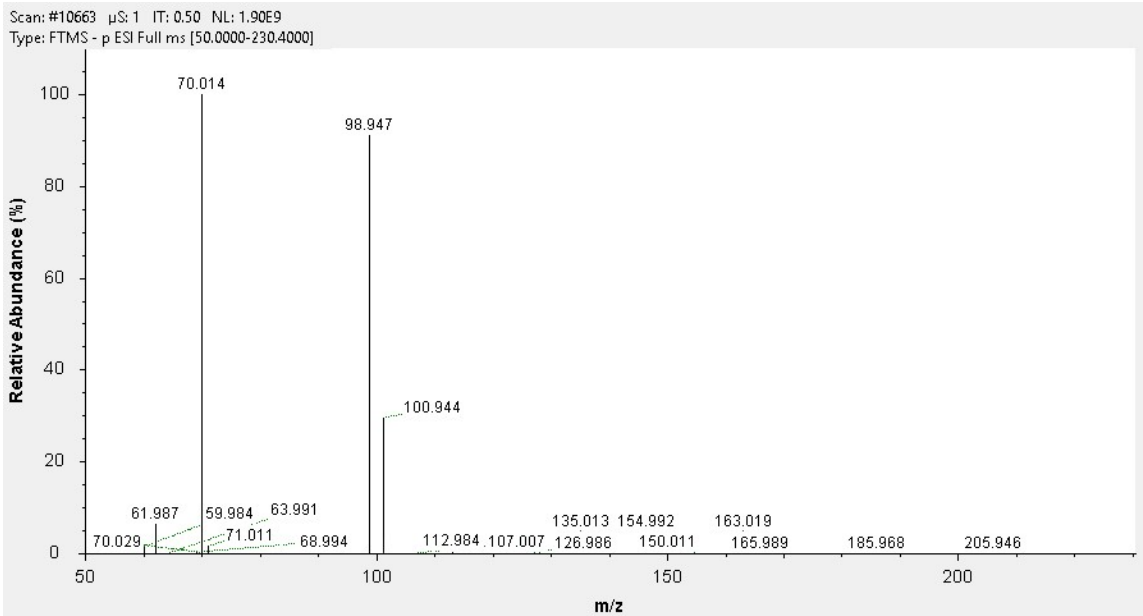

**Fig. S21** High-resolution mass spectrum of CP 4 (negative ion mode).

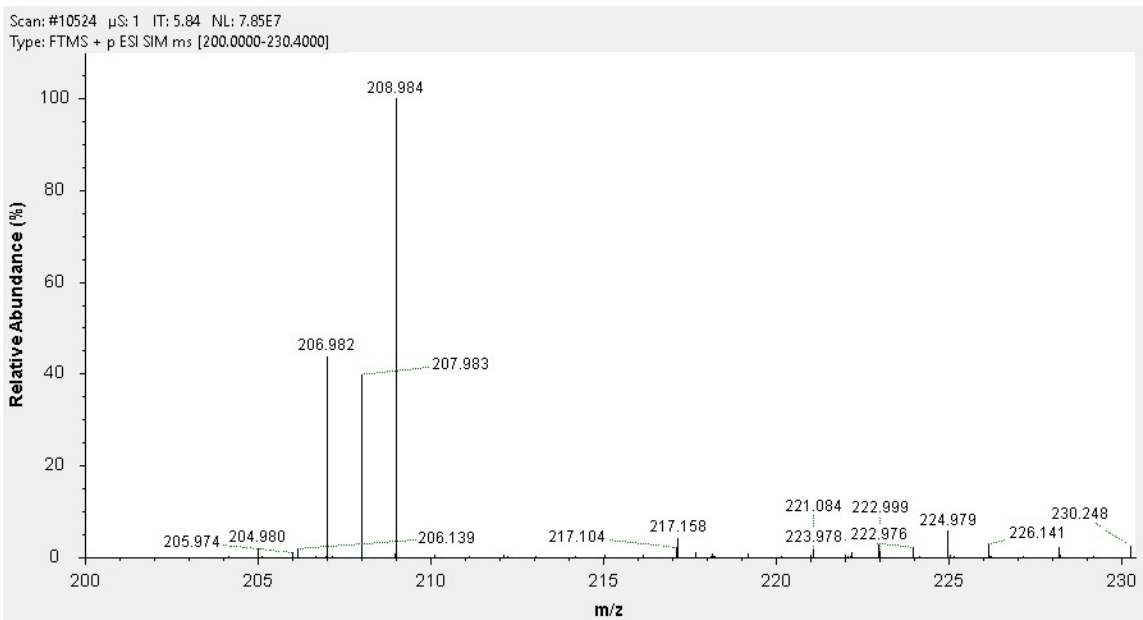

**Fig. S22** High-resolution mass spectrum of CP 4 (positive ion mode).

## 6. PXRD patterns of CPs 1-4

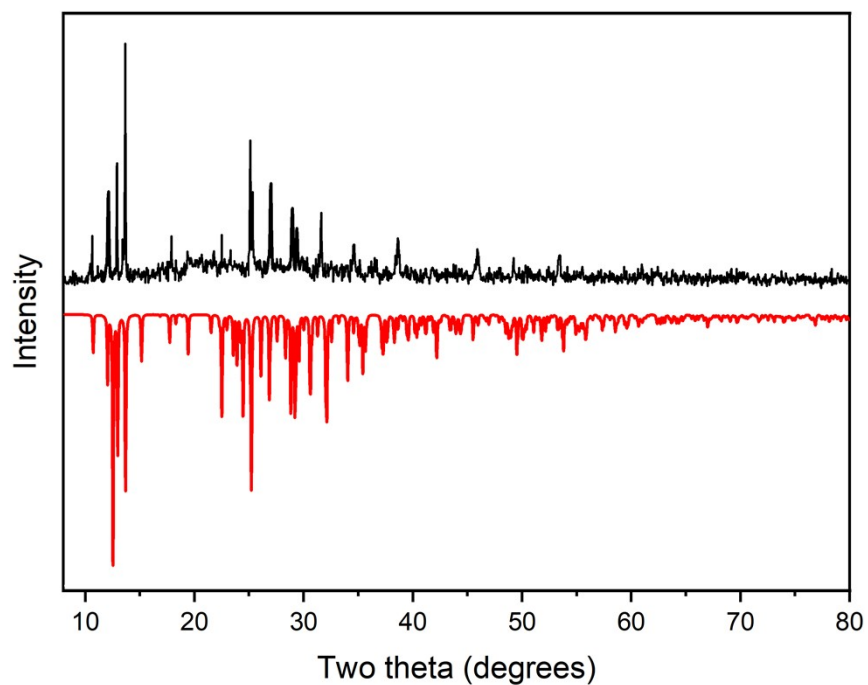

**Fig. S23** The PXRD pattern (in black) of CP **1** and the calculated pattern (in red) from its single-crystal structure.

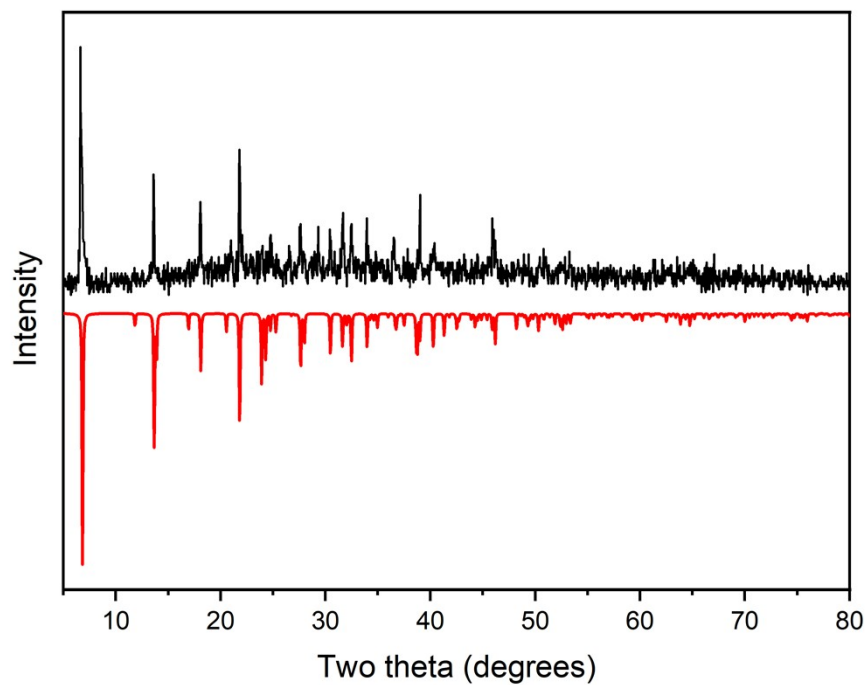

**Fig. S24** The PXRD pattern (in black) of CP **2** and the calculated pattern (in red) from its single-crystal structure.

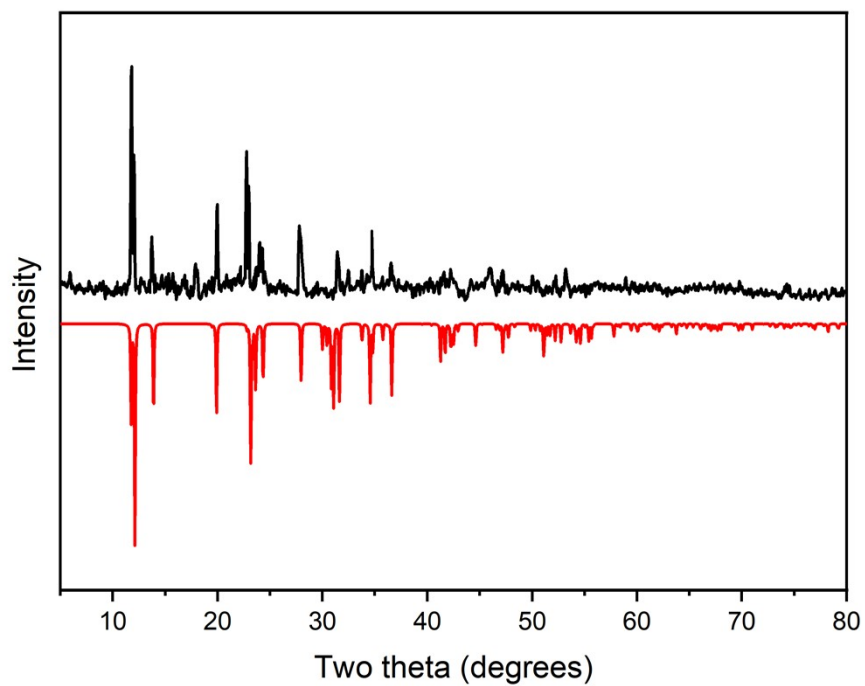

**Fig. S25** The PXRD pattern (in black) of CP **3** and the calculated pattern (in red) from its single-crystal structure.

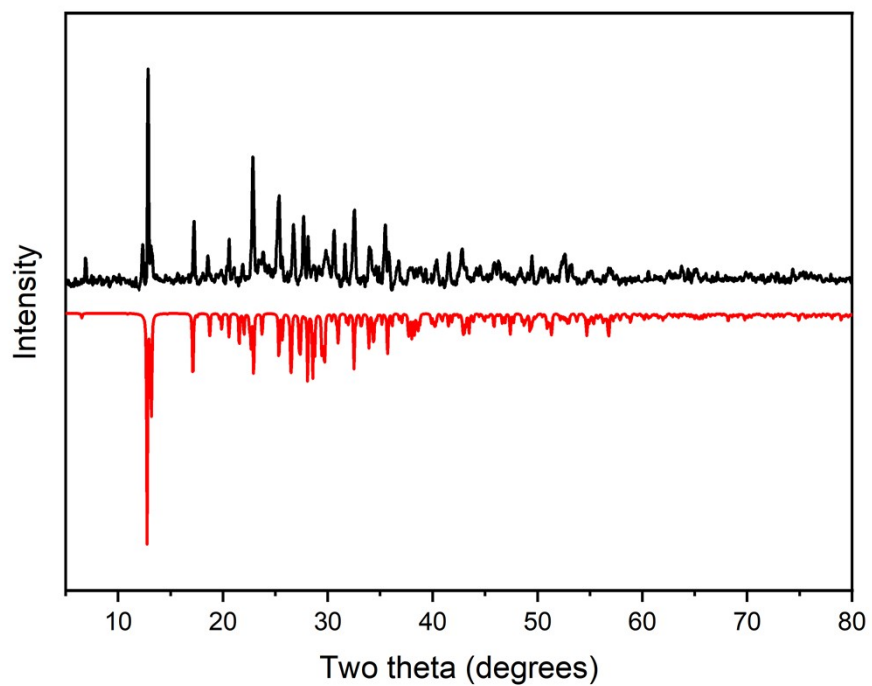

**Fig. S26** The PXRD pattern (in black) of CP **4** and the calculated pattern (in red) from its single-crystal structure.

## 7. Non-isothermal kinetic analysis

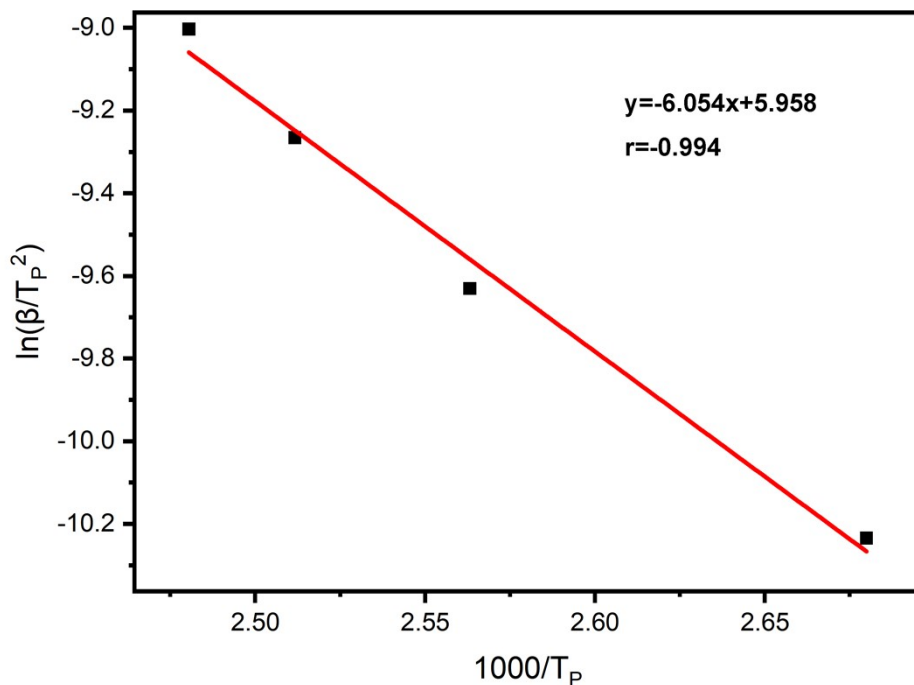

**Fig. S27** Dependence of  $\ln(\beta/T_p^2)$  on  $1/T_p$  for CP 1 (Scatter points are the experimental data and lines denote the linear fitting results).

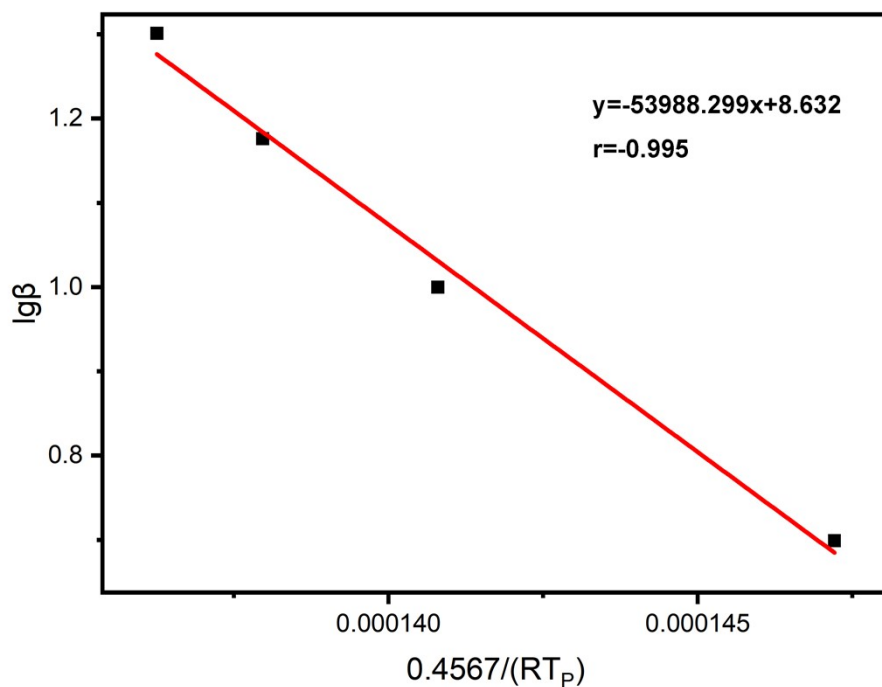

**Fig. S28** Dependence of  $\lg\beta$  on  $0.4567/RT_p$  for CP 1 (Scatter points are the experimental data and lines denote the linear fitting results).

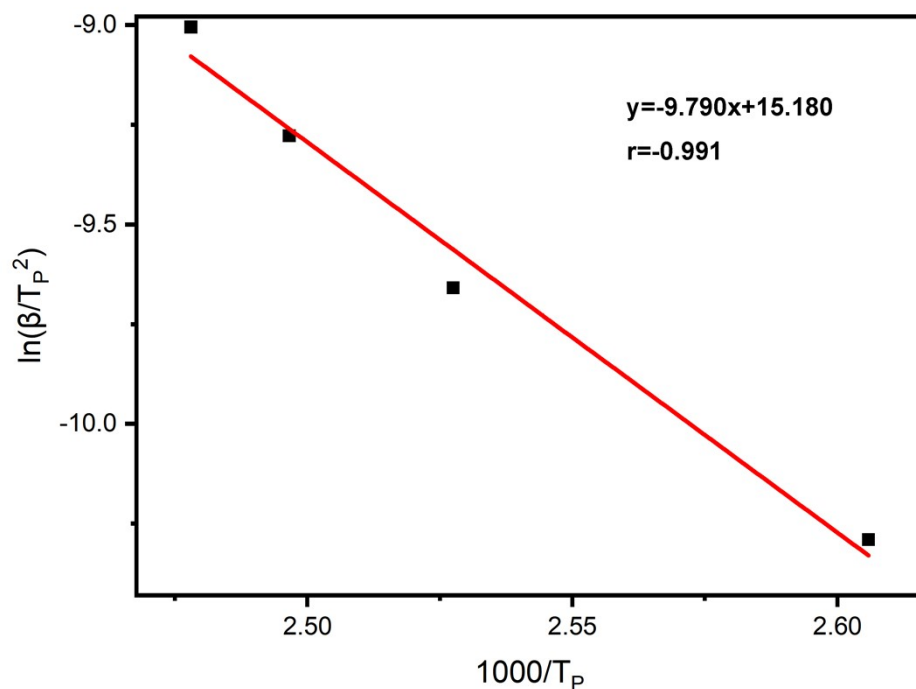

**Fig. S29** Dependence of  $\ln(\beta/T_p^2)$  on  $1/T_p$  for CP 2 (Scatter points are the experimental data and lines denote the linear fitting results).

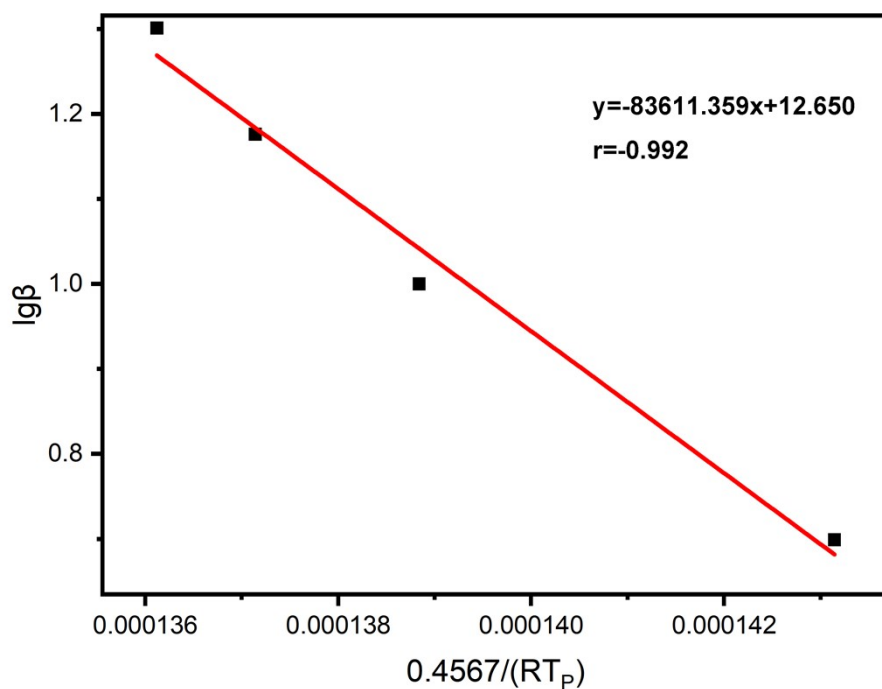

**Fig. S30** Dependence of  $\lg\beta$  on  $0.4567/RT_p$  for CP 2 (Scatter points are the experimental data and lines denote the linear fitting results).

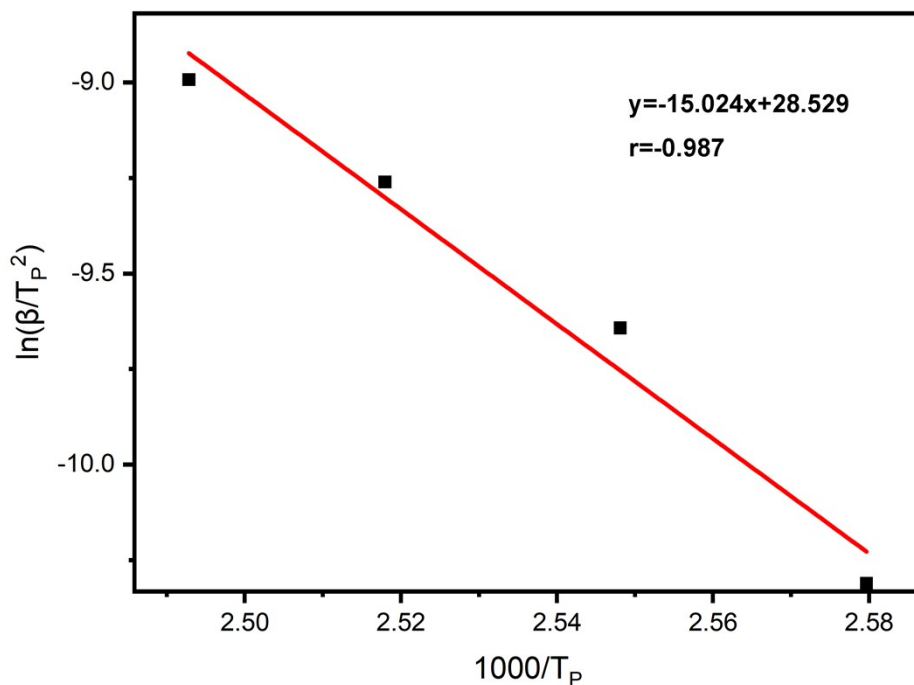

**Fig. S31** Dependence of  $\ln(\beta/T_p^2)$  on  $1/T_p$  for CP 3 (Scatter points are the experimental data and lines denote the linear fitting results).

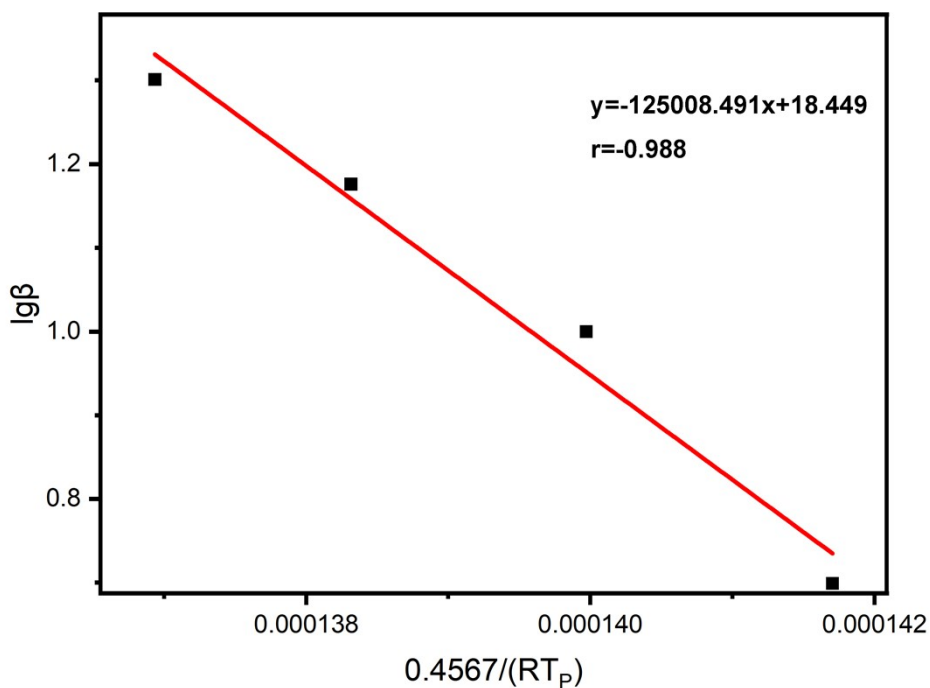

**Fig. S32** Dependence of  $\lg\beta$  on  $0.4567/RT_p$  for CP 3 (Scatter points are the experimental data and lines denote the linear fitting results).



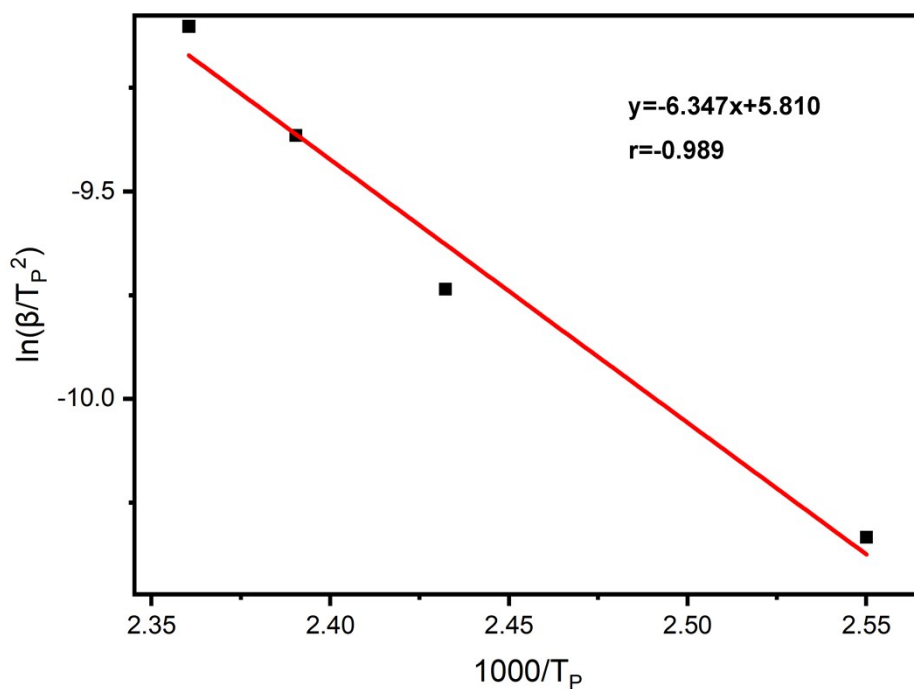

**Fig. S33** Dependence of  $\ln(\beta/T_p^2)$  on  $1/T_p$  for CP 4 (Scatter points are the experimental data and lines denote the linear fitting results).

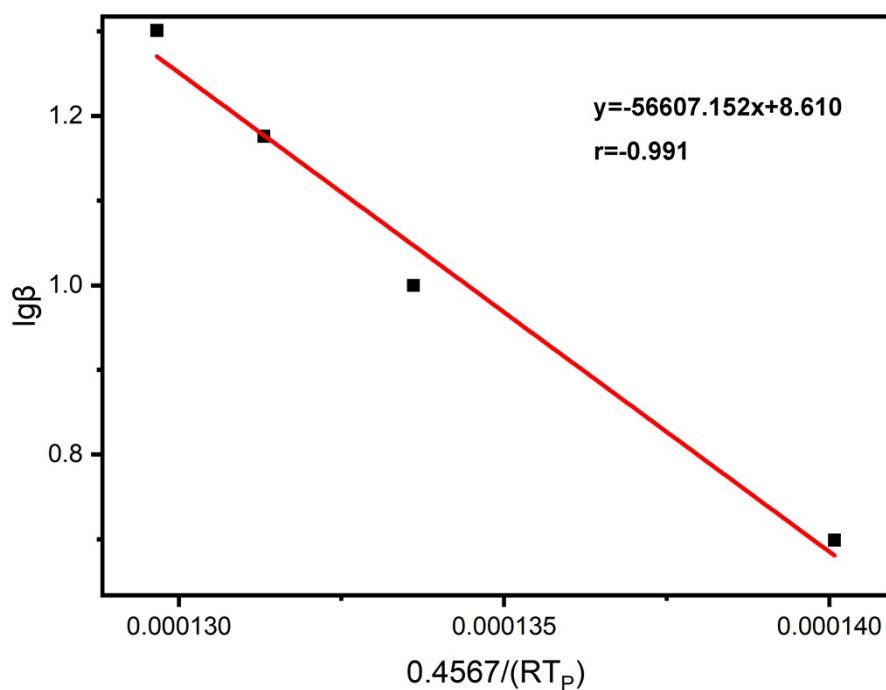

**Fig. S34** Dependence of  $\lg\beta$  on  $0.4567/RT_p$  for CP 4 (Scatter points are the experimental data and lines denote the linear fitting results).
